# Supplementary material
Source: PubMed Central journal article supplement (PMC3284229)
Supplement: NIHMS40889-supplement-Data_1.pdf [file NIHMS40889-supplement-Data_1.pdf]

## Supplementary Online Content

The Emerging Risk Factors Collaboration. Major lipids, apolipoproteins, and risk of vascular disease. *JAMA*. 2009;302(18):1993-2000.

**eTable 1.** Characteristics of the 68 Prospective Studies Contributing Data to the Current Analysis

**eTable 2.** Blood Handling, Storage and Assay Characteristics at First Measurement of Triglyceride and HDL-Cholesterol in Studies Contributing to the Current Analysis

**eTable 3.** Cross-Sectional Associations of Triglyceride, HDL-C, and Non-HDL-C With Various Baseline Characteristics

**eTable 4.** Summary of Vascular Outcomes Recorded in the 68 Prospective Studies Contributing Data to the Current Analysis

**eTable 5.** Associations of Usual Levels of Triglyceride, HDL-C and Non-HDL-C With Coronary Heart Disease and Ischaemic Stroke Risk, Adjusted for Usual Levels of Potential Confounding Factors

**eTable 6.** Associations of Usual Levels of Triglyceride, HDL-C and Non-HDL-C With Coronary Heart Disease and Ischaemic Stroke Risk, Adjusted for Usual Levels of Classical Risk Factors and Inflammatory Markers

**eTable 7.** Associations of Usual Levels of Measured LDL-C and Non-HDL-C With Coronary Heart Disease, Adjusted for Usual Levels of Potential Confounding Factors, in the Subset of Participants With Available Measurements

**eTable 8.** Associations of Usual Levels of Non-HDL-C, HDL-C, Apolipoprotein B and Apolipoprotein AI With Coronary Heart Disease and Ischaemic Stroke, Adjusted for Usual Levels of Potential Confounding Factors

**eFigure 1.** Study Flow Diagram

**eFigure 2.** Adjusted Hazard Ratios for Coronary Heart Disease per 1-SD Increase in Usual Triglyceride, HDL-C and Non-HDL-C According to Various Characteristics

**eFigure 3.** Study-Specific Hazard Ratios for CHD per 1 SD Higher of Usual Triglyceride, HDL-C and Non-HDL-C Levels  
Adjusted for Usual Levels of Potential Confounding Factors

**eAppendix 1.** Reference List of the Contributing Studies (56 References Represent the 68 Studies)

**eAppendix 2**

**eAppendix 3.** List of Studies' Acronyms

This supplementary material has been provided by the authors to give readers additional information about their work.

**eTable 1.** Characteristics of the 68 prospective studies contributing data to the current analysis (references are listed in eAppendix 1)

| Study abbreviation <sup>a</sup> | Year(s) of baseline survey | Population source            | Participants, No. | Male, No. (%) | Age at Survey, mean (SD), y | Median follow-up (5th & 95th percentiles) | Log <sub>e</sub> triglyceride mean (SD) | HDL-C (mg/dL) mean (SD) | Non-HDL-C (mg/dL) mean (SD) |
|---------------------------------|----------------------------|------------------------------|-------------------|---------------|-----------------------------|-------------------------------------------|-----------------------------------------|-------------------------|-----------------------------|
| <b>Cohort studies</b>           |                            |                              |                   |               |                             |                                           |                                         |                         |                             |
| ARIC <sup>1</sup>               | 1987-89 <sup>f</sup>       | Household lists              | 14544             | 6279 (43)     | 54 (6)                      | 14.0 (4.9-15.7)                           | 4.72 (0.51)                             | 52 (17)                 | 162 (44)                    |
| ATENA <sup>c 2</sup>            | 1983-97 <sup>f</sup>       | Electoral rolls              | 4681              | 0 (0)         | 50 (7)                      | 6.7 (5.2-8.1)                             | 4.62 (0.43)                             | 63 (16)                 | 174 (47)                    |
| BHS <sup>3</sup>                | 1969-95 <sup>f</sup>       | Electoral rolls              | 4183              | 1911 (46)     | 49 (16)                     | 21.2 (6.9-24.2)                           | 4.56 (0.54)                             | 58 (15)                 | 167 (49)                    |
| BRHS <sup>4</sup>               | 1978-80                    | GP lists                     | 4883              | 4883 (100)    | 50 (6)                      | 22.3 (4.5-23.6)                           | 5.03 (0.56)                             | 44 (11)                 | 198 (42)                    |
| BRUN <sup>5</sup>               | 1990                       | Pop. register                | 817               | 398 (49)      | 58 (11)                     | 15.3 (3.9-15.5)                           | 4.74 (0.52)                             | 57 (14)                 | 165 (41)                    |
| BUPA <sup>6</sup>               | 1975-82                    | Medical centre list          | 5288              | 5288 (100)    | 47 (8)                      | 21.0 (11.6-21.9)                          | 4.76 (0.54)                             | 51 (12)                 | 206 (46)                    |
| BWHHS <sup>7</sup>              | 1999-01                    | Pop. register                | 3118              | 0 (0)         | 69 (5)                      | 4.6 (2.0-5.6)                             | 4.98 (0.45)                             | 65 (17)                 | 194 (48)                    |
| CaPS <sup>8</sup>               | 1979-83 <sup>f</sup>       | Electoral rolls              | 2011              | 2011 (100)    | 52 (4)                      | 13.0 (4.0-13.0)                           | 5.01 (0.55)                             | 44 (13)                 | 176 (45)                    |
| CASTEL <sup>9</sup>             | 1983-87 <sup>f</sup>       | Pop. screening               | 2367              | 913 (39)      | 73 (5)                      | 11.2 (2.5-14.0)                           | 4.71 (0.44)                             | 59 (16)                 | 160 (43)                    |
| CHS-1 <sup>b 10</sup>           | 1989-93 <sup>f</sup>       | Medicare lists               | 3862              | 1481 (38)     | 72 (5)                      | 12.1 (2.0-12.9)                           | 4.84 (0.43)                             | 55 (16)                 | 157 (39)                    |
| CHS-2 <sup>b 10</sup>           | 1989-93 <sup>f</sup>       | Medicare lists               | 455               | 174 (38)      | 72 (5)                      | 9.1 (1.6-9.5)                             | 4.64 (0.43)                             | 58 (15)                 | 150 (38)                    |
| COPEN <sup>11</sup>             | 1991-94                    | Pop. register                | 7698              | 3285 (43)     | 59 (13)                     | 7.4 (2.3-8.9)                             | 4.95 (0.53)                             | 62 (19)                 | 179 (51)                    |
| DRECE <sup>12</sup>             | 1992-94                    | Pop. register                | 2541              | 1236 (49)     | 41 (10)                     | 15.4 (14.5-15.6)                          | 4.64 (0.55)                             | 54 (14)                 | 153 (44)                    |
| DUBBO <sup>13</sup>             | 1988-89                    | Electoral rolls              | 2049              | 862 (42)      | 68 (7)                      | 14.1 (1.8-14.9)                           | 4.88 (0.48)                             | 54 (15)                 | 199 (47)                    |
| EAS <sup>14</sup>               | 1987-88 <sup>f</sup>       | GP lists                     | 1002              | 499 (50)      | 64 (6)                      | 15.2 (2.8-15.8)                           | 4.77 (0.44)                             | 57 (16)                 | 211 (47)                    |
| EPESEBOS <sup>15</sup>          | 1982-83 <sup>f</sup>       | Pop. register                | 732               | 252 (34)      | 77 (4)                      | 4.0 (1.1-4.5)                             | 5.05 (0.51)                             | 48 (15)                 | 168 (41)                    |
| EPESEIOW <sup>15</sup>          | 1981-83 <sup>f</sup>       | Pop. register                | 1182              | 352 (30)      | 78 (5)                      | 4.8 (1.6-4.9)                             | 5.02 (0.52)                             | 51 (15)                 | 167 (43)                    |
| EPESENCA <sup>15</sup>          | 1986-87 <sup>f</sup>       | Pop. register                | 998               | 328 (33)      | 77 (5)                      | 4.0 (1.3-4.6)                             | 5.04 (0.51)                             | 50 (17)                 | 163 (41)                    |
| EPESENHA <sup>15</sup>          | 1982                       | Pop. register                | 572               | 217 (38)      | 78 (5)                      | 4.3 (1.5-4.7)                             | 4.97 (0.50)                             | 50 (15)                 | 168 (42)                    |
| ESTHER <sup>16</sup>            | 2000-02                    | GP lists                     | 4663              | 2005 (43)     | 62 (7)                      | 2.0 (1.9-2.7)                             | 4.76 (0.57)                             | 55 (18)                 | 169 (50)                    |
| FINE-FIN <sup>d 17</sup>        | 1985 <sup>f</sup>          | Survivors of existing cohort | 271               | 271 (100)     | 76 (5)                      | 7.0 (1.3-10.0)                            | 4.75 (0.42)                             | 46 (13)                 | 174 (41)                    |
| FINE-IT <sup>d 17</sup>         | 1985 <sup>f</sup>          | Survivors of existing cohort | 458               | 458 (100)     | 72 (4)                      | 9.8 (1.9-21.4)                            | 4.79 (0.50)                             | 51 (13)                 | 175 (43)                    |
| FINRISK-92 <sup>18</sup>        | 1992 <sup>f</sup>          | Pop. register                | 5260              | 2436 (46)     | 46 (10)                     | 11.8 (7.1-11.9)                           | 4.75 (0.55)                             | 54 (14)                 | 166 (45)                    |
| FINRISK-97 <sup>18</sup>        | 1997                       | Pop. register                | 6306              | 3126 (50)     | 51 (11)                     | 6.8 (6.0-6.9)                             | 4.75 (0.53)                             | 54 (14)                 | 165 (40)                    |
| FRAMOFF <sup>19</sup>           | 1991-95                    | Offspring & spouse to FHS    | 2699              | 1183 (44)     | 60 (9)                      | 5.2 (3.1-7.0)                             | 4.74 (0.53)                             | 54 (17)                 | 147 (36)                    |
| GOH <sup>20</sup>               | 1969-73 <sup>f</sup>       | Pop. register                | 1277              | 626 (49)      | 56 (11)                     | 24.8 (0.8-28.6)                           | 4.73 (0.49)                             | 46 (13)                 | 173 (52)                    |
| GOTO43 <sup>21</sup>            | 1993-94                    | Pop. register                | 736               | 736 (100)     | 50 (0)                      | 10.0 (8.0-10.7)                           | 4.80 (0.49)                             | 51 (13)                 | 175 (41)                    |
| GOTOW <sup>22</sup>             | 1968-70                    | Pop. register                | 710               | 0 (0)         | 70 (6)                      | 8.2 (2.8-8.7)                             | 4.75 (0.43)                             | 56 (27)                 | 190 (43)                    |
| GRIPS <sup>23</sup>             | 1982                       | Occup.                       | 5785              | 5785 (100)    | 48 (5)                      | 9.8 (4.8-10.0)                            | 4.95 (0.42)                             | 48 (12)                 | 169 (39)                    |
| HONOL <sup>24</sup>             | 1991-93                    | Service registration cards   | 2425              | 2425 (100)    | 78 (4)                      | 6.3 (1.5-7.6)                             | 4.86 (0.49)                             | 52 (13)                 | 140 (33)                    |
| HOORN <sup>25</sup>             | 1989-91                    | Pop. register                | 2198              | 971 (44)      | 61 (7)                      | 8.8 (3.6-9.9)                             | 4.82 (0.47)                             | 52 (14)                 | 206 (48)                    |
| IKNS <sup>26</sup>              | 1989-96                    | Pop. screening               | 4436              | 2081 (47)     | 57 (10)                     | 11.5 (4.8-13.6)                           | 4.75 (0.52)                             | 57 (14)                 | 140 (37)                    |

**eTable 1.** Characteristics of the 68 prospective studies contributing data to the current analysis (continued)

| Study abbreviation <sup>a</sup> | Year(s) of baseline survey | Population source       | Participants, No. | Male, No. (%)      | Age at Survey, mean (SD), y | Median follow-up (5th & 95th percentiles) | Log <sub>e</sub> triglyceride mean (SD) | HDL-C (mg/dL) mean (SD) | Non-HDL-C (mg/dL) mean (SD) |
|---------------------------------|----------------------------|-------------------------|-------------------|--------------------|-----------------------------|-------------------------------------------|-----------------------------------------|-------------------------|-----------------------------|
| KIHD <sup>27</sup>              | 1984-89 <sup>f</sup>       | Pop. register           | 2001              | 2001 (100)         | 52 (5)                      | 19.3 (3.1-23.1)                           | 4.58 (0.50)                             | 51 (11)                 | 176 (43)                    |
| MATISS-83 <sup>c 2</sup>        | 1983-97 <sup>f</sup>       | Electoral rolls         | 2552              | 1194 (47)          | 52 (10)                     | 18.6 (6.7-19.5)                           | 4.84 (0.53)                             | 51 (13)                 | 174 (45)                    |
| MATISS-87 <sup>c 2</sup>        | 1983-97 <sup>f</sup>       | Electoral rolls         | 2025              | 902 (45)           | 52 (9)                      | 15.6 (6.8-16.2)                           | 4.85 (0.48)                             | 53 (13)                 | 166 (40)                    |
| MATISS-93 <sup>c 2</sup>        | 1983-97 <sup>f</sup>       | Electoral rolls         | 1177              | 576 (49)           | 49 (9)                      | 8.3 (7.0-9.3)                             | 4.93 (0.55)                             | 50 (14)                 | 168 (42)                    |
| MICOL <sup>e 28</sup>           | 1977-87                    | Electoral rolls, Occup. | 18375             | 10351 (56)         | 51 (10)                     | 5.9 (4.5-7.1)                             | 4.73 (0.53)                             | 53 (15)                 | 167 (48)                    |
| MONFRI-94 <sup>c 2</sup>        | 1983-97 <sup>f</sup>       | Electoral rolls         | 1279              | 623 (49)           | 49 (8)                      | 8.5 (7.0-8.8)                             | 4.64 (0.54)                             | 58 (15)                 | 165 (44)                    |
| MOSWEGOT <sup>29</sup>          | 1985-95                    | Pop. register           | 4030              | 1903 (47)          | 47 (11)                     | 12.9 (7.7-18.6)                           | 4.69 (0.49)                             | 56 (16)                 | 171 (47)                    |
| NFR <sup>e 28</sup>             | 1977-87                    | Electoral rolls, Occup. | 2825              | 2825 (100)         | 55 (5)                      | 10.2 (6.1-11.2)                           | 4.83 (0.51)                             | 47 (11)                 | 167 (40)                    |
| NHANES III <sup>30</sup>        | 1988-94 <sup>f</sup>       | Census list             | 5931              | 2732 (46)          | 54 (16)                     | 8.8 (3.7-11.7)                            | 4.84 (0.57)                             | 51 (16)                 | 161 (44)                    |
| NPHS II <sup>31</sup>           | 1989-94 <sup>f</sup>       | GP lists                | 1882              | 1882 (100)         | 61 (4)                      | 3.3 (1.2-5.6)                             | 5.08 (0.51)                             | 32 (10)                 | 184 (38)                    |
| OSAKA <sup>32</sup>             | 1990-98                    | Occup. & Pop. register  | 11184             | 7502 (67)          | 53 (9)                      | 5.1 (1.5-8.1)                             | 4.77 (0.56)                             | 58 (14)                 | 146 (36)                    |
| PRIME <sup>33</sup>             | 1991-94                    | General Pop.            | 9521              | 9521 (100)         | 55 (3)                      | 5.2 (5.0-7.3)                             | 4.87 (0.50)                             | 49 (13)                 | 173 (39)                    |
| PROCAM <sup>34</sup>            | 1975-01                    | Occupational            | 20120             | 14575 (72)         | 44 (10)                     | 10.0 (3.9-18.9)                           | 4.74 (0.57)                             | 49 (14)                 | 169 (45)                    |
| QUEBEC <sup>35</sup>            | 1985-86                    | Pop. register           | 622               | 622 (100)          | 57 (7)                      | 5.3 (3.1-5.6)                             | 5.01 (0.45)                             | 40 (10)                 | 182 (41)                    |
| RANCHO <sup>36</sup>            | 1984-87                    | Household listings      | 1775              | 738 (42)           | 68 (11)                     | 14.2 (2.0-18.1)                           | 4.59 (0.55)                             | 63 (19)                 | 156 (41)                    |
| REYK <sup>37</sup>              | 1967-91                    | Pop. register           | 1427              | 351 (25)           | 62 (7)                      | 16.6 (4.6-19.3)                           | 4.60 (0.43)                             | 57 (16)                 | 198 (47)                    |
| SHHEC <sup>38</sup>             | 1984-95                    | GP lists                | 9203              | 4654 (51)          | 49 (7)                      | 10.0 (6.9-10.0)                           | 4.96 (0.55)                             | 59 (16)                 | 188 (47)                    |
| SHS <sup>39</sup>               | 1989-92 <sup>f</sup>       | Tribal rolls            | 4065              | 1588 (39)          | 56 (8)                      | 12.4 (2.1-14.3)                           | 4.81 (0.57)                             | 46 (14)                 | 145 (40)                    |
| SPEED <sup>8</sup>              | 1979-82 <sup>f</sup>       | GP lists                | 2007              | 2007 (100)         | 55 (4)                      | 16.7 (3.5-18.2)                           | 4.80 (0.49)                             | 43 (14)                 | 183 (47)                    |
| TARFS <sup>40</sup>             | 1990 <sup>f</sup>          | Household lists         | 1794              | 864 (48)           | 50 (11)                     | 5.2 (0.5-6.4)                             | 4.86 (0.52)                             | 42 (13)                 | 148 (39)                    |
| TROMSØ <sup>41</sup>            | 1986-87 <sup>f</sup>       | Household lists         | 16893             | 8541 (51)          | 40 (9)                      | 13.9 (10.3-14.3)                          | 4.66 (0.52)                             | 59 (15)                 | 167 (49)                    |
| ULSAM <sup>42</sup>             | 1970-74                    | Pop. register           | 1808              | 1808 (100)         | 54 (9)                      | 21.7 (4.2-35.6)                           | 4.96 (0.46)                             | 52 (15)                 | 209 (54)                    |
| WHITE II <sup>43</sup>          | 1985-88 <sup>f</sup>       | Civil servant           | 8114              | 5563 (69)          | 49 (6)                      | 7.8 (4.1-12.2)                            | 4.76 (0.56)                             | 56 (16)                 | 192 (47)                    |
| WHS <sup>44</sup>               | 1993-04                    | Health professionals    | 22827             | 0 (0)              | 55 (7)                      | 10.2 (8.4-10.8)                           | 4.84 (0.55)                             | 53 (15)                 | 160 (41)                    |
| ZARAGOZA <sup>45</sup>          | 1994                       | GP lists                | 1995              | 859 (43)           | 60 (11)                     | 5.1 (3.4-5.1)                             | 4.74 (0.46)                             | 55 (14)                 | 175 (38)                    |
| ZUTE <sup>46</sup>              | 1990                       | Pop. register           | 350               | 350 (100)          | 75 (4)                      | 8.9 (1.1-10.1)                            | 4.71 (0.47)                             | 45 (11)                 | 190 (43)                    |
| <i>Subtotal</i>                 |                            |                         | <i>255989</i>     | <i>137004 (54)</i> | <i>58 (9)</i>               | <i>9.6 (2.6-20.4)</i>                     | <i>4.81 (0.53)</i>                      | <i>52 (15)</i>          | <i>172 (44)</i>             |
| <b>Clinical Trials</b>          |                            |                         |                   |                    |                             |                                           |                                         |                         |                             |
| AFTCAPS <sup>47</sup>           | 1990-93 <sup>f</sup>       | Pop. screening          | 5600              | 4765 (85)          | 58 (7)                      | 5.1 (4.5-6.7)                             | 5.05 (0.38)                             | 37 (6)                  | 184 (21)                    |
| ALLHAT <sup>48</sup>            | 1994-98 <sup>f</sup>       | Pop. register           | 15297             | 7716 (50)          | 66 (7)                      | 4.3 (0.9-6.7)                             | 4.96 (0.55)                             | 47 (14)                 | 171 (40)                    |
| LEADER <sup>49</sup>            | 1993-98 <sup>f</sup>       | GP lists                | 921               | 921 (100)          | 68 (9)                      | 4.2 (0.8-6.2)                             | 5.23 (0.48)                             | 47 (15)                 | 171 (38)                    |
| MRFIT <sup>50</sup>             | 1973-76 <sup>f</sup>       | Pop. screening          | 12825             | 12825 (100)        | 47 (6)                      | 6.9 (4.4-7.8)                             | 5.10 (0.56)                             | 42 (12)                 | 198 (38)                    |
| PROSPER <sup>51</sup>           | 1998 <sup>f</sup>          | Primary Care screening  | 3252              | 1350 (42)          | 75 (3)                      | 3.2 (1.1-3.8)                             | 4.81 (0.42)                             | 51 (14)                 | 169 (35)                    |
| WOSCOPS <sup>52</sup>           | 1989-91                    | Heart screening clinic  | 6213              | 6213 (100)         | 55 (6)                      | 4.8 (2.9-6.0)                             | 5.00 (0.40)                             | 44 (9)                  | 227 (23)                    |
| <i>Subtotal</i>                 |                            |                         | <i>44108</i>      | <i>33790 (77)</i>  | <i>61 (6)</i>               | <i>5.0 (1.6-7.5)</i>                      | <i>5.0 (0.5)</i>                        | <i>45 (12)</i>          | <i>187 (35)</i>             |

**eTable 1.** Characteristics of the 68 prospective studies contributing data to the current analysis (continued)

| Study abbreviation <sup>a</sup>    | Year(s) of baseline survey | Population source | Participants, No. | Male, No. (%)      | Age at Survey, mean (SD), y | Median follow-up (5th & 95th percentiles) | Log <sub>e</sub> triglyceride mean (SD) | HDL-C (mg/dL) mean (SD) | Non-HDL-C (mg/dL) mean (SD) |
|------------------------------------|----------------------------|-------------------|-------------------|--------------------|-----------------------------|-------------------------------------------|-----------------------------------------|-------------------------|-----------------------------|
| <b>Nested Case-Control Studies</b> |                            |                   |                   |                    |                             |                                           |                                         |                         |                             |
| EPICNOR <sup>53</sup>              | 1993-98 <sup>f</sup>       | GP lists          | 1233              | 844 (68)           | 66 (8)                      | 7.2 (2.1-9.3)                             | 4.99 (0.46)                             | 51 (15)                 | 192 (45)                    |
| FIA <sup>54</sup>                  | 1985-99 <sup>f</sup>       | Pop. register     | 325               | 244 (75)           | 54 (8)                      | 5.6 (1.5-10.7)                            | 4.87 (0.50)                             | 49 (14)                 | 206 (47)                    |
| GLOSTRUP <sup>55</sup>             | 1976-84                    | Pop. register     | 199               | 164 (82)           | 51 (9)                      | 4.5 (0.5-10.5)                            | 4.86 (0.52)                             | 48 (15)                 | 208 (58)                    |
| NHS <sup>56</sup>                  | 1990 <sup>f</sup>          | Occup.            | 576               | 0 (0)              | 60 (7)                      | 8.0 (1.3-8.8)                             | 4.77 (0.56)                             | 57 (17)                 | 172 (42)                    |
| <i>Subtotal</i>                    |                            |                   | <i>2333</i>       | <i>1252 (54)</i>   | <i>58 (8)</i>               | <i>7.1 (1.5-9.3)</i>                      | <i>4.87 (0.50)</i>                      | <i>51 (16)</i>          | <i>195 (46)</i>             |
| <b>Total</b>                       |                            |                   | <b>302430</b>     | <b>172046 (57)</b> | <b>59 (8)</b>               | <b>8.1 (2.3-19.0)</b>                     | <b>4.83 (0.52)</b>                      | <b>52 (15)</b>          | <b>175 (43)</b>             |

Median (interquartile range) values were: 120 (85-175) mg/dL for triglyceride; 50 (41-61) mg/dL for HDL-C; 169 (140-201) mg/dL for non-HDL-C.

Abbreviations: Pop = Population; Occup.= Occupation based cohort; GP = General Practitioner.

<sup>a</sup> eAppendix 2 lists study acronyms.

<sup>b</sup> CHS was analysed as 2 different studies (ie, CHS-1 and CHS-2).

<sup>c</sup> Progetto CUORE was analysed as 5 different studies (ie, ATENA, MATISS-83, MATISS-87, MATISS-93 and MONFRI-94).

<sup>d</sup> FINE was analysed as 2 different studies (ie, FINE-FIN and FINE-IT).

<sup>e</sup> RIFLE was analysed as 2 different studies (ie, MICOL and NFR).

<sup>f</sup> These studies have contributed data on baseline and re-survey measurements.

**eTable 2.** Blood handling, storage and assay characteristics at first measurement of triglyceride and HDL-cholesterol in studies contributing to the current analysis.

| Study abbreviation <sup>a</sup> | Fasting status at blood sampling & duration | Sample source | HDL-C                                   |                                                                  |              |                         | Triglyceride <sup>b</sup>               |                                                                  |                         |
|---------------------------------|---------------------------------------------|---------------|-----------------------------------------|------------------------------------------------------------------|--------------|-------------------------|-----------------------------------------|------------------------------------------------------------------|-------------------------|
|                                 |                                             |               | Time between collection and measurement | Sample state before analysis, storage temperature (°C) if frozen | Assay Method | Assay Source (Standard) | Time between collection and measurement | Sample state before analysis, storage temperature (°C) if frozen | Assay Source (Standard) |
| AFTCAPS                         | Fasted >8 hrs                               | Serum         | <1 week                                 | Fresh                                                            | P-I          | NS (WHO LRC)            | <1 week                                 | Fresh                                                            | NS (WHO LRC)            |
| ALLHAT                          | Fasted >8 hrs                               | Serum         | <1 week                                 | Fresh                                                            | NS           | NS (NS)                 | <1 week                                 | Fresh                                                            | NS (NS)                 |
| ARIC                            | Fasted >8 hrs                               | Plasma        | 1 week - 1 yr                           | -70                                                              | P-I          | Boehringer (CDC)        | 1 week - 1 yr                           | -70                                                              | Boehringer (CDC)        |
| ATENA                           | Fasted >8 hrs                               | Serum         | <1 week                                 | Fresh                                                            | P-I          | Boehringer (WHO LRC)    | <1 week                                 | Fresh                                                            | Boehringer (CDC)        |
| BHS                             | Fasted >8 hrs                               | Serum         | <1 week                                 | Fresh                                                            | P-I          | Abbott (Boehringer)     | 1 week - 1 yr                           | -20                                                              | Calbiochem (Commercial) |
| BRHS                            | Non-fasted                                  | Serum         | <1 week                                 | Fresh                                                            | P-I          | Technicon (Manuf.)      | 1 week - 1 yr                           | -20                                                              | Abbott (Manuf.)         |
| BRUN                            | Fasted >8 hrs                               | Plasma        | 1 week - 1 yr                           | -70                                                              | P-I          | Merck (Manuf.)          | 1 week - 1 yr                           | -70                                                              | Merck (Manuf.)          |
| BUPA                            | Fasted NS                                   | Serum         | <1 week                                 | NS                                                               | NS           | NS (NS)                 | > 10 yrs                                | -40                                                              | Sigma (CAPRMSL)         |
| BWHHS                           | Fasted >8 hrs                               | Serum         | <1 week                                 | -20                                                              | P-I          | Roche (Manuf.)          | <1 week                                 | -20                                                              | Roche (Manuf.)          |
| CaPS                            | Fasted >8 hrs                               | Plasma        | <1 week                                 | Fresh                                                            | P-I          | Boehringer (Manuf.)     | <1 week                                 | Fresh                                                            | Boehringer (Manuf.)     |
| CASTEL                          | Fasted >8 hrs                               | Serum         | 1 week                                  | -20                                                              | P-I          | Boehringer (NS)         | 1 week - 1 yr                           | -20                                                              | In-house (Commercial)   |
| CHS-1                           | Fasted >8 hrs                               | Plasma        | <1 week                                 | -70                                                              | P-I          | Olympus (CDC)           | <1 week                                 | -70                                                              | Olympus (NS)            |
| CHS-2                           | Fasted >8 hrs                               | Plasma        | <1 week                                 | -70                                                              | P-I          | Olympus (CDC)           | <1 week                                 | -70                                                              | Olympus (NS)            |
| COPEN                           | Non-fasted                                  | Serum         | <1 week                                 | Fresh                                                            | P-I          | Boehringer (Manuf.)     | 1 week - 2 yr                           | -80                                                              | Boehringer (Manuf.)     |
| DRECE                           | Fasted >8 hrs                               | Serum         | <1 week                                 | Fresh                                                            | P-I          | Boehringer (Manuf.)     | <1 week                                 | Fresh                                                            | Boehringer (Manuf.)     |
| DUBBO                           | Fasted >8 hrs                               | Serum         | <1 week                                 | Fresh                                                            | P-I          | Boehringer (Manuf.)     | <1 week                                 | Fresh                                                            | Boehringer (Manuf.)     |
| EAS                             | Fasted >8 hrs                               | Serum         | <1 week                                 | Fresh                                                            | P-I          | Roche (Manuf.)          | <1 week                                 | Fresh                                                            | Roche (Wellcome Scheme) |
| EPESEBOS                        | Non-fasted                                  | Serum         | <1 week                                 | Fresh                                                            | P-I          | Hitachi (Manuf.)        | <1 week                                 | Fresh                                                            | Technicon (Manuf.)      |
| EPESEIOW                        | Non-fasted                                  | Serum         | <1 week                                 | Fresh                                                            | P-I          | Hitachi (Manuf.)        | <1 week                                 | Fresh                                                            | Technicon (Manuf.)      |
| EPESENCA                        | Non-fasted                                  | Serum         | <1 week                                 | Fresh                                                            | P-I          | Hitachi (Manuf.)        | <1 week                                 | Fresh                                                            | Technicon (Manuf.)      |
| EPESENHA                        | Non-fasted                                  | Serum         | <1 week                                 | Fresh                                                            | P-I          | Hitachi (Manuf.)        | <1 week                                 | Fresh                                                            | Technicon (Manuf.)      |
| EPICNOR                         | Non-fasted                                  | Serum         | <1 week                                 | Fresh                                                            | NS           | Bayer (NS)              | <1 week                                 | Fresh                                                            | Bayer (NS)              |
| ESTHER                          | Fasted NS                                   | Serum         | 1 week - 1 yr                           | -80                                                              | P-I          | Beckman (Manuf.)        | 1 week - 1 yr                           | -80                                                              | Beckman (Manuf.)        |
| FIA                             | Fasted 4 hrs                                | Plasma        | <1 week                                 | -80                                                              | NS           | NS (NS)                 | <1 week                                 | Fresh                                                            | Boehringer (NS)         |
| FINE-FIN                        | Non-fasted                                  | Serum         | 1 week - 1 yr                           | -20                                                              | P-I          | Boehringer (WHO LRC)    | 1 week - 1 yr                           | -20                                                              | Boehringer (WHO LRC)    |
| FINE-IT                         | Non-fasted                                  | Serum         | 1 week - 1 yr                           | -20                                                              | P-I          | Boehringer (WHO LRC)    | 1 week - 1 yr                           | -20                                                              | Boehringer (WHO LRC)    |

**eTable 2.** Blood handling, storage and assay characteristics at first measurement of triglyceride and HDL-cholesterol in studies contributing to the current analysis (continued)

| Study abbreviation <sup>a</sup> | Fasting status at blood sampling & duration | Sample source       | HDL-C                                   |                                                                  |              |                         | Triglyceride <sup>b</sup>               |                                                                  |                             |
|---------------------------------|---------------------------------------------|---------------------|-----------------------------------------|------------------------------------------------------------------|--------------|-------------------------|-----------------------------------------|------------------------------------------------------------------|-----------------------------|
|                                 |                                             |                     | Time between collection and measurement | Sample state before analysis, storage temperature (°C) if frozen | Assay Method | Assay Source (Standard) | Time between collection and measurement | Sample state before analysis, storage temperature (°C) if frozen | Assay Source (Standard)     |
| FINRISK92                       | Fasted 4-8 hrs                              | Serum               | <1 week                                 | Fresh                                                            | P-I          | Boehringer (Manuf.)     | <1 week                                 | Fresh                                                            | Boehringer (Manuf.)         |
| FINRISK97                       | Fasted 4-8 hrs                              | Serum               | <1 week                                 | Fresh                                                            | P-I          | Boehringer (Manuf.)     | <1 week                                 | Fresh                                                            | Boehringer (Manuf.)         |
| FRAMOFF                         | Fasted >8 hrs                               | Plasma              | <1 week                                 | Fresh                                                            | P-I          | CDC (NS)                | <1 week                                 | Fresh                                                            | Technicon (CDC)             |
| GLOSTRUP                        | Fasted >8 hrs                               | Serum               | <1 week                                 | Fresh                                                            | P-NS         | Boehringer (Manuf.)     | <1 week                                 | Fresh                                                            | Boehringer (Manuf.)         |
| GOH                             | Fasted >8 hrs                               | Plasma              | <1 week                                 | Fresh                                                            | P-II         | Boehringer (CDC)        | <1 week                                 | Fresh                                                            | Boehringer (CDC)            |
| GOTO43                          | Fasted >8 hrs                               | Serum               | <1 week                                 | Fresh                                                            | P-I          | Roche (Manuf.)          | <1 week                                 | Fresh                                                            | Boehringer (Manuf.)         |
| GOTOW                           | Fasted >8 hrs                               | Serum               | <1 week                                 | Fresh                                                            | NS           | NS (NS)                 | <1 week                                 | Fresh                                                            | Boehringer (Manuf.)         |
| GRIPS                           | Fasted 4-8 hrs                              | Serum               | <1 week                                 | Fresh                                                            | P-I          | Immuno (Manuf.)         | 1-5 yrs                                 | -90                                                              | Boehringer (Manuf.)         |
| HONOL                           | Fasted >8 hrs                               | Plasma              | 1 week - 1 yr                           | -70                                                              | P-I          | Olympus (CDC)           | 1 week - 1 yr                           | -70                                                              | Olympus (CDC)               |
| HOORN                           | Fasted >8 hrs                               | Serum               | <1 week                                 | Fresh                                                            | P-I          | Boehringer (Manuf.)     | <1 week                                 | Fresh                                                            | Boehringer (Manuf.)         |
| IKNS                            | Non-fasted                                  | Serum               | 1 week - 1 yr                           | Fresh                                                            | P-I          | Technicon (CDC)         | 1 week - 1 yr                           | -70                                                              | Technicon (CDC)             |
| KIHD                            | Fasted >8 hrs                               | Serum               | <1 week                                 | Fresh                                                            | P-II         | Boehringer (Orion)      | 1 week - 1 yr                           | -70                                                              | Boehringer (CAPRMSL)        |
| LEADER                          | Non-fasted                                  | Serum               | <1 week                                 | Fresh                                                            | P-I          | NS (NS)                 | <1 week                                 | Fresh                                                            | Wako (Manuf.)               |
| MATISS-83                       | Fasted >8 hrs                               | Serum               | <1 week                                 | Fresh                                                            | P-I          | Boehringer (WHO LRC)    | <1 week                                 | Fresh                                                            | Boehringer (CDC)            |
| MATISS-87                       | Fasted >8 hrs                               | Serum               | <1 week                                 | Fresh                                                            | P-I          | Boehringer (WHO LRC)    | <1 week                                 | Fresh                                                            | Boehringer (CDC)            |
| MATISS-93                       | Fasted >8 hrs                               | Serum               | <1 week                                 | Fresh                                                            | P-I          | Boehringer (WHO LRC)    | <1 week                                 | Fresh                                                            | Boehringer (CDC)            |
| MICOL                           | Fasted >8 hrs                               | Serum               | NS                                      | NS                                                               | P-I          | NS (WHO LRC)            | NS                                      | NS                                                               | Multiple (WHO LRC)          |
| MONFRI-94                       | Fasted >8 hrs                               | Serum               | <1 week                                 | Fresh                                                            | P-I          | Boehringer (WHO LRC)    | <1 week                                 | Fresh                                                            | Boehringer (CDC)            |
| MOSWEGOT                        | Fasted >8 hrs                               | Serum               | <1 week                                 | Fresh                                                            | P-I          | Roche (Manuf.)          | <1 week                                 | Fresh                                                            | NS (NS)                     |
| MRFIT                           | Fasted >8 hrs                               | Plasma <sup>c</sup> | NS                                      | NS                                                               | P-I & II     | Technicon (CDC)         | NS                                      | NS                                                               | Technicon (CDC)             |
| NFR                             | Fasted >8 hrs                               | Serum               | NS                                      | NS                                                               | P-I          | NS (WHO LRC)            | NS                                      | NS                                                               | Multiple (WHO LRC)          |
| NHANES III                      | Fasted >6 hrs                               | Serum               | 1 week - 1 yr                           | -20                                                              | P-I          | CDC (NS)                | 1 week - 1 yr                           | -20                                                              | Boehringer (CDC)            |
| NHS                             | Fasted Variable                             | Plasma              | 10 yrs                                  | -130                                                             | Homo         | Roche (Manuf.)          | 10 yrs                                  | -130                                                             | Roche (Manuf.)              |
| NPHS II                         | Non-fasted                                  | Serum               | 1 week - 1 yr                           | -40                                                              | P-I          | Sigma Poole (NS)        | 1 week - 1 yr                           | -40                                                              | Wako (Precinorm & Precilip) |
| OSAKA                           | Non-fasted                                  | Serum               | <1 week                                 | -70                                                              | P-NS         | CDC (NS)                | 1 week - 1 yr                           | -70                                                              | Daiichi (NS)                |
| PRIME                           | Fasted >8 hrs                               | Plasma              | <1 week                                 | Fresh                                                            | P-I          | Boehringer (NS)         | <1 week                                 | Fresh                                                            | Boehringer (Manuf.)         |
| PROCAM                          | Fasted >8 hrs                               | Serum               | <1 week                                 | Fresh                                                            | P-?          | Roche (NS)              | <1 week                                 | Fresh                                                            | Boehringer (Manuf.)         |
| PROSPER                         | Fasted >8 hrs                               | Plasma              | <1 week                                 | Fresh                                                            | P-I          | Roche (cFas calibrator) | <1 week                                 | Fresh                                                            | Roche (cFas calibrator)     |

**eTable 2.** Blood handling, storage and assay characteristics at first measurement of triglyceride and HDL-cholesterol in studies contributing to the current analysis (continued)

| Study abbreviation <sup>a</sup> | Fasting status at blood sampling & duration | Sample source      | HDL-C                                   |                                                                  |              |                         | Triglyceride <sup>b</sup>               |                                                                  |                         |
|---------------------------------|---------------------------------------------|--------------------|-----------------------------------------|------------------------------------------------------------------|--------------|-------------------------|-----------------------------------------|------------------------------------------------------------------|-------------------------|
|                                 |                                             |                    | Time between collection and measurement | Sample state before analysis, storage temperature (°C) if frozen | Assay Method | Assay Source (Standard) | Time between collection and measurement | Sample state before analysis, storage temperature (°C) if frozen | Assay Source (Standard) |
| QUEBEC                          | Fasted >8 hrs                               | Plasma             | <1 week                                 | Fresh                                                            | P-I          | Technicon (In-house)    | <1 week                                 | Fresh                                                            | Technicon (In-house)    |
| RANCHO                          | Fasted >8 hrs                               | Plasma             | <1 week                                 | Fresh                                                            | P-II         | LRC (NS)                | <1 week                                 | Fresh                                                            | Abbot (CDC)             |
| REYK                            | Fasted >8 hrs                               | Serum <sup>d</sup> | <1 week                                 | Fresh                                                            | P-I          | NS (NS)                 | <1 week                                 | Fresh                                                            | Technicon (NS)          |
| SHHEC                           | Non-fasted                                  | Serum              | <1 week                                 | -20                                                              | P-NS         | COBAS Bio (NS)          | <1 week                                 | Fresh                                                            | COBAS Bio (WHO LRC)     |
| SHS                             | Fasted >8 hrs                               | Plasma             | <1 week                                 | -70                                                              | P-I          | Boehringer (CDC)        | NS                                      | -70                                                              | Boehringer (CDC)        |
| SPEED                           | Fasted >8 hrs                               | Plasma             | <1 week                                 | Fresh                                                            | P-I          | NS (NS)                 | <1 week                                 | Fresh                                                            | Boehringer (NS)         |
| TARFS                           | Fasted >8 hrs                               | Plasma             | <1 week                                 | Fresh                                                            | P-I          | Roche (Manuf.)          | <1 week                                 | Fresh                                                            | Roche (Manuf.)          |
| TROMSØ                          | Non-fasted                                  | Serum              | <1 week                                 | Fresh                                                            | P-I          | Boehringer (NS)         | <1 week                                 | Fresh                                                            | Boehringer (NS)         |
| ULSAM                           | Fasted >8 hrs                               | Serum              | >10 yrs                                 | -150                                                             | P-I          | Technicon (Manuf.)      | > 10 yrs                                | -150                                                             | Technicon (Manuf.)      |
| WHITEII                         | Fasted NS                                   | Serum              | <1 week                                 | Fresh                                                            | P-I          | Boehringer (NS)         | <1 week                                 | Fresh                                                            | Boehringer (Manuf.)     |
| WHS                             | Non-fasted                                  | Plasma             | <1 week                                 | -150                                                             | Homo         | Roche (NS)              | NS                                      | NS                                                               | NS (NS)                 |
| WOSCOPS                         | Fasted >8 hrs                               | Plasma             | <1 week                                 | Fresh                                                            | P-II         | LRC (NS)                | <1 week                                 | Fresh                                                            | Boehringer (LRC)        |
| ZARAGOZA                        | Fasted >8 hrs                               | Serum              | <1 week                                 | Fresh                                                            | P-I          | NS (NS)                 | <1 week                                 | Fresh                                                            | NS                      |
| ZUTE                            | Fasted >8 hrs                               | Serum              | <1 month                                | -20                                                              | P-I          | Boehringer (NS)         | 1-5 yrs                                 | -20                                                              | Boehringer (CDC)        |

Abbreviations: NS = Not Stated; Homo=Homogenous; Manuf.= Manufacturer; P = precipitation; P-I : HDL-C measured following precipitation of apo-B containing particles; P-II : As for P-I, but precipitation is preceded by preparative ultracentrifugation to remove triglycerides containing particles i.e. VLDL & Chylomicrons; CDC = Centers for Disease Control and Prevention; LRC = Lipid Research Clinic; CAPRMSL = College of American Pathologists' Reference Material for Serum Lipids.

<sup>a</sup> eAppendix 2 lists study acronyms.

<sup>b</sup> All the studies used enzymatic assay methods to measure triglyceride concentration except for OSAKA, which used a non-enzymatic method.

<sup>c</sup> serum for triglyceride.

<sup>d</sup> plasma for HDL-C.



**eTable 3.** Cross-sectional associations of triglyceride, HDL-C, and non-HDL-C with various baseline characteristics

|                                      | Summary of available data |                    |                | Correlates of log <sub>e</sub> triglyceride |                                                                                                                       | Correlates of HDL-C                         |                                                                                                           | Correlates of non-HDL-C                     |                                                                                                               |
|--------------------------------------|---------------------------|--------------------|----------------|---------------------------------------------|-----------------------------------------------------------------------------------------------------------------------|---------------------------------------------|-----------------------------------------------------------------------------------------------------------|---------------------------------------------|---------------------------------------------------------------------------------------------------------------|
|                                      | No of studies             | No of participants | Mean (SD) or % | Pearson Correlation r (95% CI) <sup>a</sup> | Percentage difference (95%CI) in triglyceride levels per 1 SD increase or compared to reference category <sup>b</sup> | Pearson Correlation r (95% CI) <sup>a</sup> | Difference (95%CI) in HDL-C levels per 1 SD increase or compared to reference category <sup>b</sup> mg/dL | Pearson Correlation r (95% CI) <sup>a</sup> | Difference (95%CI) in non-HDL-C levels per 1 SD increase or compared to reference category <sup>s</sup> mg/dL |
| <b>Age at survey (yrs)</b>           | 68                        | 302430             | 59 (8)         | 0.04 (0.02, 0.06)                           | 2 (0, 3)                                                                                                              | 0.04 (0.02, 0.05)                           | 0.52 (0.32, 0.72)                                                                                         | 0.06 (0.02, 0.10)                           | 1.89 (0.20, 3.57)                                                                                             |
| <b>Sex</b>                           | 68                        | 302430             |                |                                             |                                                                                                                       |                                             |                                                                                                           |                                             |                                                                                                               |
| Male                                 | 63                        | 172046             | 57%            | -                                           | Ref                                                                                                                   | -                                           | Ref                                                                                                       | -                                           | Ref                                                                                                           |
| Female                               | 49                        | 130384             | 43%            | -                                           | -12 (-16, -8)                                                                                                         | -                                           | 8.97 (8.01, 9.94)                                                                                         | -                                           | 0.69 (-2.59, 3.96)                                                                                            |
| <b>Race</b>                          | 51                        | 206798             |                |                                             |                                                                                                                       |                                             |                                                                                                           |                                             |                                                                                                               |
| White                                | 47                        | 171564             | 83%            | -                                           | Ref                                                                                                                   | -                                           | Ref                                                                                                       | -                                           | Ref                                                                                                           |
| Asian                                | 7                         | 18665              | 9%             | -                                           | 8 (-2, 19)                                                                                                            | -                                           | -1.29 (-4.91, 2.33)                                                                                       | -                                           | 0.36 (-6.28, 7.00)                                                                                            |
| Black                                | 13                        | 14050              | 7%             | -                                           | -23 (-28, -18)                                                                                                        | -                                           | 4.34 (2.58, 6.09)                                                                                         | -                                           | -5.93 (-8.91, -2.96)                                                                                          |
| Other                                | 14                        | 2519               | 1%             | -                                           | 1 (-3, 6)                                                                                                             | -                                           | -0.26 (-1.38, 0.87)                                                                                       | -                                           | -2.18 (-5.64, 1.28)                                                                                           |
| <b>Smoking status</b>                | 68                        | 302430             |                |                                             |                                                                                                                       |                                             |                                                                                                           |                                             |                                                                                                               |
| Other                                | 68                        | 208793             | 69%            | -                                           | Ref                                                                                                                   | -                                           | Ref                                                                                                       | -                                           | Ref                                                                                                           |
| Current                              | 67                        | 93637              | 31%            | -                                           | 5 (4, 7)                                                                                                              | -                                           | -2.15 (-2.63, -1.67)                                                                                      | -                                           | 2.32 (1.11, 3.53)                                                                                             |
| <b>Alcohol status</b>                | 57                        | 255009             |                |                                             |                                                                                                                       |                                             |                                                                                                           |                                             |                                                                                                               |
| Other                                | 57                        | 94882              | 37%            | -                                           | Ref                                                                                                                   | -                                           | Ref                                                                                                       | -                                           | Ref                                                                                                           |
| Current                              | 50                        | 160127             | 63%            | -                                           | -2 (-4, 0)                                                                                                            | -                                           | 4.38 (3.87, 4.89)                                                                                         | -                                           | -2.12 (-3.43, -0.81)                                                                                          |
| <b>History of diabetes</b>           | 68                        | 302430             |                |                                             |                                                                                                                       |                                             |                                                                                                           |                                             |                                                                                                               |
| Other                                | 68                        | 281405             | 93%            | -                                           | Ref                                                                                                                   | -                                           | Ref                                                                                                       | -                                           | Ref                                                                                                           |
| Definite diabetic                    | 66                        | 21025              | 7%             | -                                           | 20 (18, 23)                                                                                                           | -                                           | -4.27 (-5.13, -3.40)                                                                                      | -                                           | 0.25 (-1.51, 2.02)                                                                                            |
| <b>Lipid markers</b>                 |                           |                    |                |                                             |                                                                                                                       |                                             |                                                                                                           |                                             |                                                                                                               |
| Total cholesterol, mg/dL             | 68                        | 302430             | 226 (42)       | 0.36 (0.34, 0.38)                           | 18 (17, 20)                                                                                                           | 0.12 (0.11, 0.14)                           | 1.57 (1.31, 1.83)                                                                                         | 0.94 (0.94, 0.95)                           | 40.56 (40.30, 40.83)                                                                                          |
| Non-HDL-C, mg/dL                     | 68                        | 302430             | 175 (43)       | 0.49 (0.47, 0.50)                           | 25 (23, 26)                                                                                                           | -0.22 (-0.24, -0.20)                        | -3.39 (-3.70, -3.07)                                                                                      | -                                           | -                                                                                                             |
| HDL-C, mg/dL                         | 68                        | 302430             | 52 (15)        | -0.40 (-0.43, -0.37)                        | -22 (-24, -20)                                                                                                        | -                                           | -                                                                                                         | -0.22 (-0.24, -0.20)                        | -10.18 (-10.80, -9.56)                                                                                        |
| Log <sub>e</sub> triglyceride, mg/dL | 68                        | 302430             | 4.83 (0.52)    | -                                           | -                                                                                                                     | -0.40 (-0.43, -0.37)                        | -5.60 (-6.74, -4.46)                                                                                      | 0.49 (0.47, 0.50)                           | 21.02 (19.67, 22.36)                                                                                          |
| LDL-C, mg/dL                         | 8                         | 44243              | 147 (33)       | 0.10 (-0.04, 0.23)                          | 5 (-1, 11)                                                                                                            | -0.05 (-0.11, 0.00)                         | -0.91 (-1.77, -0.04)                                                                                      | 0.86 (0.80, 0.90)                           | 31.58 (27.29, 35.87)                                                                                          |
| Apolipoprotein B, mg/dL              | 24                        | 93524              | 112 (29)       | 0.49 (0.45, 0.53)                           | 24 (22, 26)                                                                                                           | -0.22 (-0.26, -0.19)                        | 10.78 (9.55, 12.01)                                                                                       | 0.86 (0.83, 0.88)                           | 37.53 (33.93, 41.13)                                                                                          |
| Apolipoprotein AI, mg/dL             | 24                        | 96771              | 149 (29)       | -0.18 (-0.21, -0.14)                        | -9 (-8, -11)                                                                                                          | 0.75 (0.72, 0.77)                           | -3.39 (-4.06, -2.72)                                                                                      | -0.04 (-0.07, -0.01)                        | -2.46 (-3.88, -1.03)                                                                                          |

**eTable 3.** Cross-sectional associations of triglyceride, HDL-C, and non-HDL-C with various baseline characteristics (continued)

|                                |    |        |          |                   |                |                      |                         |                   |                         |
|--------------------------------|----|--------|----------|-------------------|----------------|----------------------|-------------------------|-------------------|-------------------------|
| <b>Non-lipid markers</b>       |    |        |          |                   |                |                      |                         |                   |                         |
| Systolic blood pressure, mmHg  | 68 | 302430 | 137 (18) | 0.15 (0.13, 0.17) | 6 (6, 7)       | -0.01 (-0.03, 0.01)  | -0.19 (-0.39, 0.01)     | 0.11 (0.09, 0.13) | 3.51 (3.00, 4.03)       |
| Diastolic blood pressure, mmHg | 67 | 300906 | 82 (11)  | 0.15 (0.13, 0.17) | 6 (6, 7)       | -0.05 (-0.06, -0.03) | -0.37 (-0.55, -0.20)    | 0.12 (0.09, 0.14) | 4.08 (3.53, 4.64)       |
| Body mass index <sup>c</sup>   | 68 | 302430 | 26 (4)   | 0.26 (0.23, 0.28) | 13 (12, 15)    | -0.21 (-0.23, -0.19) | -3.13 (-3.59, -2.67)    | 0.14 (0.12, 0.17) | 6.07 (5.06, 7.07)       |
| <b>Geographical location</b>   | 68 | 302430 |          |                   |                |                      |                         |                   |                         |
| Western Europe                 | 44 | 180520 | 60%      | -                 | Ref            | -                    | Ref                     | -                 | Ref                     |
| North America                  | 18 | 96987  | 32%      | -                 | 15 (8, 23)     | -                    | -11.52 (-13.51, -9.54)  | -                 | -30.58 (-36.57, -24.59) |
| Other                          | 6  | 24923  | 8%       | -                 | -9 (-17, -2)   | -                    | -5.97 (-8.07, -3.87)    | -                 | -37.63 (-43.96, -31.30) |
| <b>Fasting status</b>          | 68 | 302430 |          |                   |                |                      |                         |                   |                         |
| Non-fasted/random/<8hrs        | 20 | 103354 | 34%      | -                 | Ref            | -                    | Ref                     | -                 | Ref                     |
| >=8hrs/fasted NS               | 48 | 199076 | 66%      | -                 | 37 (32, 42)    | -                    | -14.96 (-16.30, -13.62) | -                 | 20.27 (16.23, 24.32)    |
| <b>Sample type</b>             | 68 | 302159 |          |                   |                |                      |                         |                   |                         |
| Serum                          | 48 | 221092 | 73%      | -                 | Ref            | -                    | Ref                     | -                 | Ref                     |
| Plasma                         | 19 | 81067  | 34%      | -                 | -41 (-46, -36) | -                    | 15.54 (14.20, 16.89)    | -                 | -42.62 (-46.68, -38.56) |
| <b>Study design</b>            | 68 | 302430 |          |                   |                |                      |                         |                   |                         |
| Cohort                         | 58 | 255989 | 85%      | -                 | Ref            | -                    | Ref                     | -                 | Ref                     |
| Case-control                   | 4  | 2333   | 1%       | -                 | 27 (18, 36)    | -                    | 2.05 (-0.52, 4.63)      | -                 | 55.37 (47.60, 63.13)    |
| Clinical trial                 | 6  | 44108  | 14%      | -                 | 42 (36, 49)    | -                    | -9.47 (-11.19, -7.75)   | -                 | 24.79 (19.61, 29.96)    |

SI conversions: To convert total cholesterol, HDL-C, non-HDL-C and LDL-C to mmol/L, multiply by 0.0259; triglyceride to mmol/L, multiply by 0.0113; apolipoproteins to g/L, multiply by 0.01.

Abbreviations: CI, confidence interval; HDL-C, high density lipoprotein cholesterol; LDL-C, low density lipoprotein cholesterol.

<sup>a</sup> Pearson correlation coefficient between HDL-C, log<sub>e</sub> triglycerides or non-HDL-C and the row variable pooled across studies using random effects meta-analyses.

<sup>b</sup> Adjusted for sex and age, allowing for random effects across studies.

<sup>c</sup> Body mass index is calculated as weight in kilograms divided by height in meters squared.

**eTable 4.** Summary of vascular outcomes recorded in the 68 prospective studies contributing data to the current analysis

| Study abbreviation <sup>a</sup> | Non-fatal MI & coronary death | Non-fatal MI | Ischaemic stroke | Haemorrhagic stroke | Unclassified stroke | Other CV deaths |
|---------------------------------|-------------------------------|--------------|------------------|---------------------|---------------------|-----------------|
| <b>Cohort studies</b>           |                               |              |                  |                     |                     |                 |
| ARIC                            | 871                           | 673          | 452              | 53                  | 16                  | 198             |
| ATENA <sup>c</sup>              | 17                            | 16           | 1*               | 2*                  | 0                   | 7*              |
| BHS                             | 248                           | 0            | 10               | 8*                  | 80                  | 85              |
| BRHS                            | 838                           | 476          | 4*               | 11                  | 298                 | 85              |
| BRUN                            | 54                            | 23           | 24               | 15                  | 0                   | 7*              |
| BUPA                            | 157                           | 0            | 3*               | 6*                  | 15                  | 34              |
| BWHHS                           | 55                            | 31           | 19               | 4*                  | 14                  | 14              |
| CaPS                            | 236                           | 130          | 3*               | 2*                  | 8*                  | 19              |
| CASTEL                          | 91                            | 0            | 0                | 0                   | 100                 | 298             |
| CHS-1 <sup>b</sup>              | 593                           | 380          | 367              | 62                  | 37                  | 55              |
| CHS-2 <sup>b</sup>              | 52                            | 31           | 35               | 5*                  | 4*                  | 6*              |
| COPEN                           | 278                           | 245          | 179              | 36                  | 85                  | 82              |
| DRECE                           | 13                            | 0            | 0                | 1*                  | 3*                  | 7*              |
| DUBBO                           | 281                           | 220          | 75               | 19                  | 85                  | 66              |
| EAS                             | 77                            | 38           | 0                | 3*                  | 59                  | 18              |
| EPESEBOS                        | 35                            | 28           | 17               | 6*                  | 1*                  | 23              |
| EPESEIOW                        | 53                            | 32           | 21               | 6*                  | 25                  | 35              |
| EPESENCA                        | 47                            | 28           | 30               | 5*                  | 15                  | 21              |
| EPESENHA                        | 20                            | 16           | 10               | 2*                  | 9*                  | 42              |
| ESTHER                          | 27                            | 21           | 2*               | 0                   | 51                  | 2*              |
| FINE-FIN <sup>d</sup>           | 70                            | 33           | 8*               | 1*                  | 16                  | 12              |
| FINE-IT <sup>d</sup>            | 67                            | 18           | 4*               | 5*                  | 83                  | 39              |
| FINRISK-92                      | 150                           | 119          | 83               | 36                  | 0                   | 22              |
| FINRISK-97                      | 107                           | 74           | 73               | 19                  | 0                   | 20              |
| FRAMOFF                         | 52                            | 48           | 23               | 1*                  | 0                   | 0               |
| GOH                             | 32                            | 0            | 0                | 0                   | 9*                  | 19              |
| GOTO43                          | 24                            | 23           | 9*               | 1*                  | 1*                  | 2*              |
| GOTOW                           | 29                            | 15           | 0                | 0                   | 58                  | 7*              |
| GRIPS                           | 299                           | 299          | 0                | 0                   | 103                 | 47              |
| HONOL                           | 149                           | 108          | 12               | 39                  | 67                  | 23              |
| HOORN                           | 73                            | 60           | 3*               | 4*                  | 46                  | 44              |
| IKNS                            | 16                            | 13           | 82               | 28                  | 1*                  | 2*              |
| KIHD                            | 383                           | 372          | 103              | 34                  | 3*                  | 26              |
| MATISS-83 <sup>c</sup>          | 83                            | 46           | 14               | 7*                  | 48                  | 162             |
| MATISS-87 <sup>c</sup>          | 44                            | 20           | 6*               | 4*                  | 30                  | 73              |
| MATISS-93 <sup>c</sup>          | 14                            | 11           | 0                | 0                   | 3*                  | 12              |
| MICOL <sup>e</sup>              | 96                            | 0            | 7*               | 2*                  | 20                  | 10              |

**eTable 4.** Summary of vascular outcomes recorded in the 68 prospective studies contributing data to the current analysis (continued)

|                                    |              |             |             |            |             |             |
|------------------------------------|--------------|-------------|-------------|------------|-------------|-------------|
| MONFRI-94 <sup>c</sup>             | 11           | 11          | 3*          | 7*         | 2*          | 13          |
| MOSWEGOT                           | 139          | 101         | 63          | 17         | 15          | 20          |
| NFR <sup>e</sup>                   | 86           | 0           | 2*          | 7*         | 10          | 7*          |
| NHANES III                         | 216          | 0           | 0           | 0          | 74          | 96          |
| NPHS II                            | 73           | 66          | 16          | 4*         | 4*          | 5*          |
| OSAKA                              | 30           | 26          | 42          | 14         | 3*          | 11          |
| PRIME                              | 145          | 128         | 33          | 6*         | 3*          | 20          |
| PROCAM                             | 486          | 367         | 77          | 22         | 7*          | 149         |
| QUEBEC                             | 20           | 19          | 0           | 0          | 2*          | 5*          |
| RANCHO                             | 221          | 219         | 0           | 1*         | 175         | 100         |
| REYK                               | 159          | 97          | 12          | 8*         | 20          | 16          |
| SHHEC                              | 291          | 218         | 32          | 10         | 52          | 19          |
| SHS                                | 439          | 297         | 8*          | 10         | 185         | 113         |
| SPEED                              | 237          | 92          | 64          | 2*         | 5*          | 22          |
| TARFS                              | 59           | 23          | 1*          | 0          | 16          | 17          |
| TROMSØ                             | 470          | 402         | 136         | 29         | 19          | 42          |
| ULSAM                              | 435          | 327         | 151         | 39         | 27          | 73          |
| WHITE II                           | 197          | 167         | 1*          | 1*         | 3*          | 14          |
| WHS                                | 226          | 219         | 212         | 20         | 2*          | 74          |
| ZARAGOZA                           | 43           | 30          | 6*          | 0          | 27          | 0           |
| ZUTE                               | 52           | 35          | 1*          | 1*         | 29          | 24          |
| <i>Subtotal</i>                    | <b>9766</b>  | <b>6491</b> | <b>2467</b> | <b>513</b> | <b>2000</b> | <b>2407</b> |
| <b>Clinical Trials</b>             |              |             |             |            |             |             |
| AFTCAPS                            | 107          | 104         | 16          | 0          | 1*          | 16          |
| ALLHAT                             | 613          | 611         | 0           | 0          | 275         | 0           |
| LEADER                             | 99           | 36          | 51          | 3*         | 12          | 16          |
| MRFIT                              | 765          | 581         | 5*          | 4*         | 61          | 49          |
| PROSPER                            | 266          | 201         | 0           | 0          | 115         | 14          |
| WOSCOPS                            | 371          | 300         | 0           | 0          | 73          | 9*          |
| <i>Subtotal</i>                    | <b>2221</b>  | <b>1833</b> | <b>67</b>   | <b>0</b>   | <b>536</b>  | <b>95</b>   |
| <b>Nested Case-Control Studies</b> |              |             |             |            |             |             |
| EPICNOR                            | 434          | 233         | 0           | 0          | 0           | 0           |
| FIA                                | 95           | 71          | 0           | 0          | 0           | 0           |
| GLOSTRUP                           | 68           | 52          | 0           | 0          | 0           | 0           |
| NHS                                | 201          | 177         | 0           | 0          | 0           | 0           |
| <i>Subtotal</i>                    | <b>798</b>   | <b>533</b>  | <b>0</b>    | <b>0</b>   | <b>0</b>    | <b>0</b>    |
| <b>Total</b>                       | <b>12785</b> | <b>8857</b> | <b>2534</b> | <b>513</b> | <b>2536</b> | <b>2502</b> |

\* studies with fewer than 10 events do not contribute to the subtotals and overall total for each endpoint

<sup>a</sup>Appendix 2 lists study acronyms.

<sup>b</sup>CHS was analysed as 2 different studies (ie, CHS-1 and CHS-2).

<sup>c</sup>Progetto CUORE was analysed as 5 different studies (ie, ATENA, MATISS-83, MATISS-87, MATISS-93 and MONFRI-94).

<sup>d</sup>FINE was analysed as 2 different studies (ie, FINE-FIN and FINE-IT).

<sup>e</sup>RIFLE was analysed as 2 different studies (ie, MICOL and NFR).

**eTable 5.** Associations of usual levels of triglyceride, HDL-C and non-HDL-C with coronary heart disease and ischaemic stroke risk, adjusted for usual levels of potential confounding factors.

|                                                                                 | Triglyceride<br>Per 68% (1-SD) higher |                 |                            | HDL-C<br>Per 15 mg/dL (1-SD) higher |                 |                            | Non-HDL-C<br>Per 43 mg/dL (1-SD) higher |                 |                            |
|---------------------------------------------------------------------------------|---------------------------------------|-----------------|----------------------------|-------------------------------------|-----------------|----------------------------|-----------------------------------------|-----------------|----------------------------|
|                                                                                 | HR<br>(95% CI)                        | Wald $\chi^2_1$ | I <sup>2</sup><br>(95% CI) | HR<br>(95% CI)                      | Wald $\chi^2_1$ | I <sup>2</sup><br>(95% CI) | HR<br>(95% CI)                          | Wald $\chi^2_1$ | I <sup>2</sup><br>(95% CI) |
| <b>Coronary heart disease</b><br>(68 studies, 302 430 individuals, 12785 cases) |                                       |                 |                            |                                     |                 |                            |                                         |                 |                            |
| Adjusted for age and sex                                                        | 1.51 (1.44, 1.59)                     | 258             | 66 (56, 73)                | 0.67 (0.63, 0.71)                   | 174             | 70 (62, 77)                | 1.63 (1.54, 1.74)                       | 244             | 79 (74, 83)                |
| Plus systolic blood pressure                                                    | 1.43 (1.37, 1.50)                     | 253             | 53 (39, 65)                | 0.68 (0.64, 0.72)                   | 177             | 66 (57, 74)                | 1.57 (1.48, 1.67)                       | 224             | 77 (71, 81)                |
| Plus smoking status                                                             | 1.41 (1.35, 1.47)                     | 255             | 47 (30, 60)                | 0.69 (0.66, 0.73)                   | 170             | 64 (53, 72)                | 1.56 (1.47, 1.65)                       | 229             | 75 (68, 80)                |
| Plus body mass index                                                            | 1.40 (1.34, 1.46)                     | 234             | 45 (27, 59)                | 0.70 (0.66, 0.74)                   | 162             | 61 (50, 70)                | 1.55 (1.47, 1.65)                       | 221             | 75 (68, 80)                |
| Plus history of diabetes                                                        | 1.37 (1.31, 1.42)                     | 214             | 42 (22, 57)                | 0.71 (0.68, 0.75)                   | 149             | 60 (48, 69)                | 1.56 (1.47, 1.66)                       | 229             | 74 (68, 80)                |
| Plus non-HDL-C                                                                  | 1.13 (1.07, 1.19)                     | 23              | 39 (18, 54)                | 0.78 (0.74, 0.82)                   | 96              | 48 (31, 61)                | -                                       | -               | -                          |
| Plus HDL-C                                                                      | 0.99 (0.94, 1.05)                     | 0               | 35 (12, 52)                | -                                   | -               | -                          | 1.48 (1.40, 1.57)                       | 171             | 73 (66, 79)                |
| Plus log <sub>e</sub> triglyceride                                              | -                                     | -               | -                          | 0.78 (0.74, 0.82)                   | 84              | 40 (20, 55)                | 1.50 (1.39, 1.61)                       | 122             | 73 (66, 79)                |
| <b>Ischaemic stroke</b><br>(32 studies, 173 312 individuals, 2534 cases)        |                                       |                 |                            |                                     |                 |                            |                                         |                 |                            |
| Adjusted for age and sex                                                        | 1.26 (1.18, 1.34)                     | 47              | 10 (0, 40)                 | 0.84 (0.77, 0.92)                   | 14              | 41 (9, 61)                 | 1.21 (1.14, 1.28)                       | 37              | 3 (0, 41)                  |
| Plus systolic blood pressure                                                    | 1.17 (1.11, 1.24)                     | 29              | 1 (0, 40)                  | 0.86 (0.79, 0.93)                   | 13              | 38 (5, 59)                 | 1.15 (1.08, 1.22)                       | 21              | 0 (0, 40)                  |
| Plus smoking status                                                             | 1.17 (1.10, 1.24)                     | 27              | 0 (0, 40)                  | 0.87 (0.80, 0.95)                   | 9               | 39 (7, 60)                 | 1.14 (1.08, 1.21)                       | 20              | 0 (0, 40)                  |
| Plus body mass index                                                            | 1.17 (1.08, 1.28)                     | 13              | 27 (0, 53)                 | 0.87 (0.80, 0.95)                   | 10              | 36 (2, 58)                 | 1.14 (1.08, 1.21)                       | 20              | 0 (0, 40)                  |
| Plus history of diabetes                                                        | 1.12 (1.05, 1.19)                     | 14              | 0 (0, 40)                  | 0.89 (0.82, 0.97)                   | 7               | 33 (0, 57)                 | 1.14 (1.08, 1.21)                       | 19              | 0 (0, 40)                  |
| Plus non-HDL-C                                                                  | 1.08 (0.99, 1.17)                     | 3               | 10 (0, 41)                 | 0.91 (0.84, 1.00)                   | 4               | 31 (0, 56)                 | -                                       | -               | -                          |
| Plus HDL-C                                                                      | 1.02 (0.94, 1.11)                     | 0               | 0 (0, 40)                  | -                                   | -               | -                          | 1.12 (1.05, 1.19)                       | 13              | 0 (0, 40)                  |
| Plus log <sub>e</sub> triglyceride                                              | -                                     | -               | -                          | 0.93 (0.84, 1.02)                   | 2               | 27 (0, 53)                 | 1.12 (1.04, 1.20)                       | 9               | 0 (0, 40)                  |

Regression analyses were stratified, where appropriate, by sex and trial arm.

Studies with fewer than 10 cases were excluded from analysis of each outcome.

There was evidence of considerable heterogeneity among the studies of non-HDL-C, however sensitivity analyses that excluded the 10 most discrepant studies (FINE-FIN, CHS-2, EPESENHA, GOH, AFTCAPS, PROSPER, CHS-1, IKNS, GRIPS, MONFRI-94) yielded broadly similar results (HRs 1.50 [95% CI 1.46, 1.55]), with the I<sup>2</sup> reduced to 49% (95% CI 30%-62%).

**eTable 6.** Associations of usual levels of triglyceride, HDL-C and non-HDL-C with coronary heart disease and ischaemic stroke risk, adjusted for usual levels of classical risk factors and inflammatory markers.

|                                          | Adjustment for conventional risk factors plus fibrinogen |                                        |                                            | Adjustment for conventional risk factors plus C-reactive protein |                                        |                                            |
|------------------------------------------|----------------------------------------------------------|----------------------------------------|--------------------------------------------|------------------------------------------------------------------|----------------------------------------|--------------------------------------------|
|                                          | HR (95% CI)                                              |                                        |                                            | HR (95% CI)                                                      |                                        |                                            |
|                                          | Triglyceride<br>Per 68% (1-SD)<br>higher                 | HDL-C<br>Per 15 mg/dL<br>(1-SD) higher | Non-HDL-C<br>Per 43 mg/dL<br>(1-SD) higher | Triglyceride<br>Per 68% (1-SD)<br>higher                         | HDL-C<br>Per 15 mg/dL<br>(1-SD) higher | Non-HDL-C<br>Per 43 mg/dL<br>(1-SD) higher |
| <b>Coronary heart disease</b>            | <i>33 studies, 144 118 individuals, 6067 cases</i>       |                                        |                                            | <i>30 studies, 80719 individuals, 4497 cases</i>                 |                                        |                                            |
| Adjusted for age and sex                 | 1.52 (1.41, 1.63)                                        | 0.66 (0.61, 0.71)                      | 1.64 (1.49, 1.81)                          | 1.49 (1.35, 1.63)                                                | 0.68 (0.62, 0.76)                      | 1.52 (1.38, 1.68)                          |
| Plus systolic blood pressure             | 1.44 (1.35, 1.54)                                        | 0.67 (0.62, 0.72)                      | 1.58 (1.44, 1.74)                          | 1.41 (1.30, 1.54)                                                | 0.70 (0.63, 0.76)                      | 1.47 (1.34, 1.62)                          |
| Plus smoking status                      | 1.41 (1.33, 1.50)                                        | 0.68 (0.63, 0.73)                      | 1.56 (1.43, 1.71)                          | 1.38 (1.28, 1.49)                                                | 0.71 (0.64, 0.78)                      | 1.46 (1.33, 1.60)                          |
| Plus body mass index                     | 1.41 (1.32, 1.50)                                        | 0.68 (0.64, 0.73)                      | 1.56 (1.42, 1.70)                          | 1.37 (1.27, 1.49)                                                | 0.71 (0.65, 0.78)                      | 1.46 (1.33, 1.60)                          |
| Plus history of diabetes                 | 1.37 (1.29, 1.45)                                        | 0.70 (0.66, 0.75)                      | 1.56 (1.43, 1.71)                          | 1.34 (1.24, 1.45)                                                | 0.72 (0.66, 0.80)                      | 1.47 (1.34, 1.62)                          |
| Plus other lipid markers†                | 0.98 (0.90, 1.06)                                        | 0.76 (0.71, 0.82)                      | 1.50 (1.34, 1.68)                          | 1.04 (0.97, 1.12)                                                | 0.80 (0.73, 0.88)                      | 1.36 (1.24, 1.50)                          |
| Plus fibrinogen                          | 1.00 (0.92, 1.09)                                        | 0.80 (0.75, 0.86)                      | 1.37 (1.23, 1.52)                          | -                                                                | -                                      | -                                          |
| Plus log <sub>e</sub> C-reactive protein | -                                                        | -                                      | -                                          | 1.03 (0.96, 1.10)                                                | 0.81 (0.74, 0.89)                      | 1.34 (1.22, 1.46)                          |
| <b>Ischaemic stroke</b>                  | <i>21 studies, 110 732 individuals, 1834 cases</i>       |                                        |                                            | <i>13 studies, 50870 individuals, 1099 cases</i>                 |                                        |                                            |
| Adjusted for age and sex                 | 1.26 (1.18, 1.35)                                        | 0.86 (0.78, 0.95)                      | 1.20 (1.12, 1.28)                          | 1.20 (1.04, 1.38)                                                | 0.90 (0.79, 1.04)                      | 1.12 (0.98, 1.28)                          |
| Plus systolic blood pressure             | 1.18 (1.11, 1.26)                                        | 0.87 (0.79, 0.96)                      | 1.14 (1.07, 1.22)                          | 1.14 (1.00, 1.30)                                                | 0.92 (0.80, 1.05)                      | 1.07 (0.94, 1.23)                          |
| Plus smoking status                      | 1.18 (1.10, 1.26)                                        | 0.89 (0.81, 0.98)                      | 1.14 (1.07, 1.22)                          | 1.13 (0.99, 1.28)                                                | 0.94 (0.82, 1.07)                      | 1.07 (0.94, 1.22)                          |
| Plus body mass index                     | 1.18 (1.10, 1.26)                                        | 0.90 (0.81, 0.99)                      | 1.14 (1.06, 1.22)                          | 1.14 (1.00, 1.30)                                                | 0.92 (0.81, 1.04)                      | 1.09 (0.96, 1.23)                          |
| Plus history of diabetes                 | 1.13 (1.05, 1.21)                                        | 0.92 (0.84, 1.01)                      | 1.14 (1.06, 1.22)                          | 1.11 (0.98, 1.25)                                                | 0.94 (0.83, 1.05)                      | 1.10 (0.98, 1.23)                          |
| Plus other lipid markers†                | 1.06 (0.96, 1.16)                                        | 0.97 (0.88, 1.07)                      | 1.09 (1.00, 1.19)                          | 1.05 (0.91, 1.19)                                                | 0.97 (0.87, 1.08)                      | 1.09 (0.97, 1.22)                          |
| Plus fibrinogen                          | 1.07 (0.97, 1.17)                                        | 0.99 (0.91, 1.07)                      | 1.06 (0.97, 1.15)                          | -                                                                | -                                      | -                                          |
| Plus log <sub>e</sub> C-reactive protein | -                                                        | -                                      | -                                          | 1.02 (0.90, 1.16)                                                | 0.96 (0.86, 1.08)                      | 1.09 (0.98, 1.21)                          |

Regression analyses were stratified, where appropriate, by sex and trial arm.

† Analyses of analyses of log<sub>e</sub> triglyceride were adjusted for HDL-C and non-HDL-C levels, analyses of HDL-C were adjusted for non-HDL-C and log<sub>e</sub> triglyceride levels, and analyses of non-HDL-C were adjusted for HDL-C and log<sub>e</sub> triglyceride levels. Studies with fewer than 10 cases were excluded from analysis of each outcome.

**eTable 7.** Associations of usual levels of measured LDL-C and non-HDL-C with coronary heart disease, adjusted for usual levels of potential confounding factors, in the subset of participants with available measurements.

|                                                                             | LDL-C<br>Per 33 mg/dL (1-SD) higher |                 |                            | Non-HDL-C<br>Per 39 mg/dL (1-SD) higher |                 |                            |
|-----------------------------------------------------------------------------|-------------------------------------|-----------------|----------------------------|-----------------------------------------|-----------------|----------------------------|
|                                                                             | HR<br>(95% CI)                      | Wald $\chi^2_1$ | I <sup>2</sup><br>(95% CI) | HR<br>(95% CI)                          | Wald $\chi^2_1$ | I <sup>2</sup><br>(95% CI) |
| <b>Coronary heart disease</b><br>(8 studies, 44234 individuals, 2076 cases) |                                     |                 |                            |                                         |                 |                            |
| Adjusted for age and sex                                                    | 1.39 (1.09, 1.78)                   | 7               | 94 (91, 96)                | 1.55 (1.23, 1.95)                       | 14              | 93 (88, 96)                |
| Plus systolic blood pressure                                                | 1.37 (1.08, 1.74)                   | 7               | 94 (90, 96)                | 1.48 (1.19, 1.85)                       | 12              | 92 (87, 95)                |
| Plus smoking status                                                         | 1.34 (1.03, 1.73)                   | 5               | 93 (89, 96)                | 1.46 (1.18, 1.82)                       | 12              | 91 (86, 95)                |
| Plus body mass index                                                        | 1.40 (1.10, 1.80)                   | 7               | 93 (89, 96)                | 1.48 (1.19, 1.84)                       | 12              | 92 (86, 95)                |
| Plus history of diabetes                                                    | 1.41 (1.11, 1.81)                   | 8               | 93 (89, 96)                | 1.49 (1.20, 1.86)                       | 13              | 91 (86, 95)                |
| Plus log <sub>e</sub> triglyceride                                          | 1.37 (1.09, 1.73)                   | 7               | 92 (87, 95)                | 1.39 (1.04, 1.87)                       | 5               | 92 (87, 95)                |
| Plus HDL-C                                                                  | 1.38 (1.09, 1.73)                   | 7               | 92 (86, 95)                | 1.42 (1.06, 1.91)                       | 5               | 92 (87, 95)                |

Regression analyses were stratified, where appropriate, by sex and trial arm.  
Studies with fewer than 10 cases were excluded from analysis of each outcome.

**eTable 8.** Associations of usual levels of non-HDL-C, HDL-C, apolipoprotein B and apolipoprotein AI with coronary heart disease and ischaemic stroke, adjusted for usual levels of potential confounding factors.

|                                                                              | <b>Non-HDL-C</b><br>Per 43 mg/dL<br>(1-SD) higher | <b>ApoB</b><br>Per 29 mg/dL<br>(1-SD) increase | <b>HDL-C</b><br>Per 15 mg/dL<br>(1-SD) higher | <b>ApoAI</b><br>Per 29 mg/dL<br>(1-SD) increase | <b>Non-HDL-C / HDL-C</b><br>Per 1.53 unit<br>(1-SD) increase | <b>ApoB / ApoAI</b><br>Per 0.27 unit<br>(1-SD) increase |
|------------------------------------------------------------------------------|---------------------------------------------------|------------------------------------------------|-----------------------------------------------|-------------------------------------------------|--------------------------------------------------------------|---------------------------------------------------------|
|                                                                              | <b>HR</b><br><b>(95% CI)</b>                      | <b>HR</b><br><b>(95% CI)</b>                   | <b>HR</b><br><b>(95% CI)</b>                  | <b>HR</b><br><b>(95% CI)</b>                    | <b>HR</b><br><b>(95% CI)</b>                                 | <b>HR</b><br><b>(95% CI)</b>                            |
| <b>Coronary heart disease</b><br>(22 studies, 91307 individuals, 4499 cases) |                                                   |                                                |                                               |                                                 |                                                              |                                                         |
| Adjusted for age and sex                                                     | 1.73 (1.52, 1.96)                                 | 1.71 (1.51, 1.95)                              | 0.66 (0.59, 0.73)                             | 0.70 (0.63, 0.77)                               | 1.63 (1.45, 1.83)                                            | 1.59 (1.46, 1.74)                                       |
| Plus systolic blood pressure                                                 | 1.65 (1.46, 1.86)                                 | 1.64 (1.46, 1.85)                              | 0.67 (0.61, 0.74)                             | 0.72 (0.66, 0.69)                               | 1.58 (1.42, 1.76)                                            | 1.56 (1.44, 1.71)                                       |
| Plus smoking status                                                          | 1.63 (1.46, 1.83)                                 | 1.62 (1.44, 1.82)                              | 0.69 (0.63, 0.76)                             | 0.74 (0.67, 0.81)                               | 1.55 (1.40, 1.72)                                            | 1.53 (1.41, 1.66)                                       |
| Plus body mass index                                                         | 1.62 (1.45, 1.82)                                 | 1.60 (1.43, 1.80)                              | 0.70 (0.63, 0.77)                             | 0.75 (0.69, 0.83)                               | 1.54 (1.39, 1.71)                                            | 1.52 (1.40, 1.65)                                       |
| Plus history of diabetes                                                     | 1.55 (1.34, 1.80)                                 | 1.61 (1.44, 1.80)                              | 0.71 (0.65, 0.79)                             | 0.81 (0.74, 0.88)                               | 1.52 (1.37, 1.68)                                            | 1.51 (1.39, 1.63)                                       |
| Plus lipid markers†                                                          | 1.59 (1.36, 1.85)                                 | 1.58 (1.39, 1.79)                              | 0.77 (0.72, 0.83)                             | 0.78 (0.72, 0.86)                               | 1.50 (1.38, 1.62)                                            | 1.49 (1.39, 1.60)                                       |
| <b>Ischaemic stroke</b><br>(8 studies, 60571 individuals, 1192 cases)        |                                                   |                                                |                                               |                                                 |                                                              |                                                         |
| Adjusted for age and sex                                                     | 1.16 (1.06, 1.26)                                 | 1.19 (1.03, 1.38)                              | 0.88 (0.79, 0.97)                             | 0.90 (0.82, 0.99)                               | 1.23 (1.11, 1.36)                                            | 1.23 (1.13, 1.34)                                       |
| Plus systolic blood pressure                                                 | 1.10 (1.01, 1.20)                                 | 1.13 (0.99, 1.30)                              | 0.90 (0.81, 1.00)                             | 0.90 (0.82, 0.99)                               | 1.19 (1.10, 1.28)                                            | 1.19 (1.10, 1.28)                                       |
| Plus smoking status                                                          | 1.10 (1.01, 1.20)                                 | 1.12 (0.98, 1.28)                              | 0.91 (0.82, 1.01)                             | 0.91 (0.83, 1.00)                               | 1.17 (1.09, 1.27)                                            | 1.16 (1.08, 1.26)                                       |
| Plus body mass index                                                         | 1.10 (1.00, 1.20)                                 | 1.11 (0.97, 1.28)                              | 0.92 (0.84, 0.99)                             | 0.93 (0.84, 1.02)                               | 1.16 (1.08, 1.26)                                            | 1.15 (1.07, 1.25)                                       |
| Plus history of diabetes                                                     | 1.09 (1.00, 1.19)                                 | 1.13 (1.00, 1.27)                              | 0.95 (0.87, 1.03)                             | 0.96 (0.87, 1.06)                               | 1.12 (1.04, 1.22)                                            | 1.13 (1.04, 1.23)                                       |
| Plus lipid markers†                                                          | 1.08 (0.97, 1.20)                                 | 1.19 (1.05, 1.34)                              | 0.96 (0.90, 1.02)                             | 0.97 (0.88, 1.08)                               | 1.14 (1.05, 1.24)                                            | 1.13 (1.05, 1.21)                                       |

Regression analyses were stratified, where appropriate, by sex and trial arm.

Studies with fewer than 10 cases were excluded from analysis of each outcome.

† Analyses of non-HDL-C were adjusted for HDL-C and log<sub>e</sub> triglyceride, analyses of apolipoprotein B were adjusted for apolipoprotein AI and log<sub>e</sub> triglyceride, analyses of HDL-C were adjusted for non-HDL-C and log<sub>e</sub> triglyceride, and analyses of apolipoprotein AI were adjusted for apolipoprotein B and log<sub>e</sub> triglyceride; analyses of non-HDL-C / HDL-C and apoB / apoA were adjusted for log<sub>e</sub> triglyceride.



**eFigure 1.** Study Flow Diagram

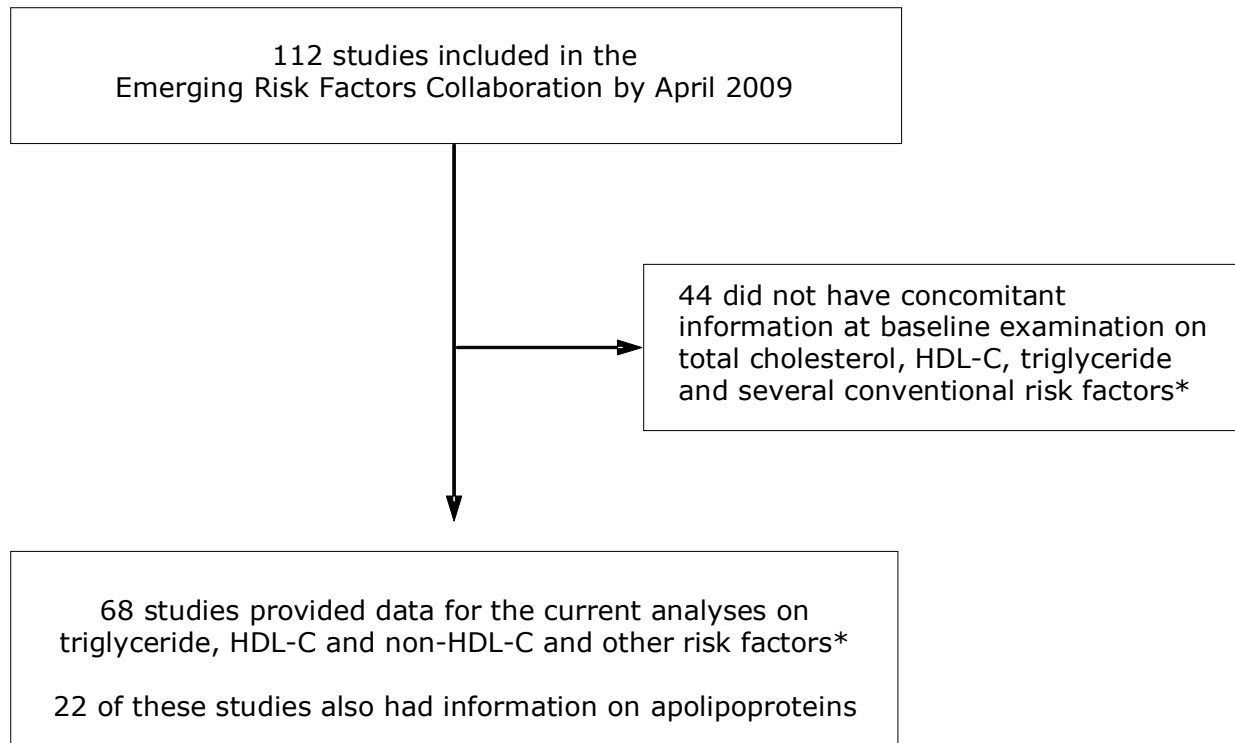

**eFigure 2.** Adjusted hazard ratios for coronary heart disease per 1-SD increase in usual triglyceride, HDL-C and non-HDL-C according to various characteristics

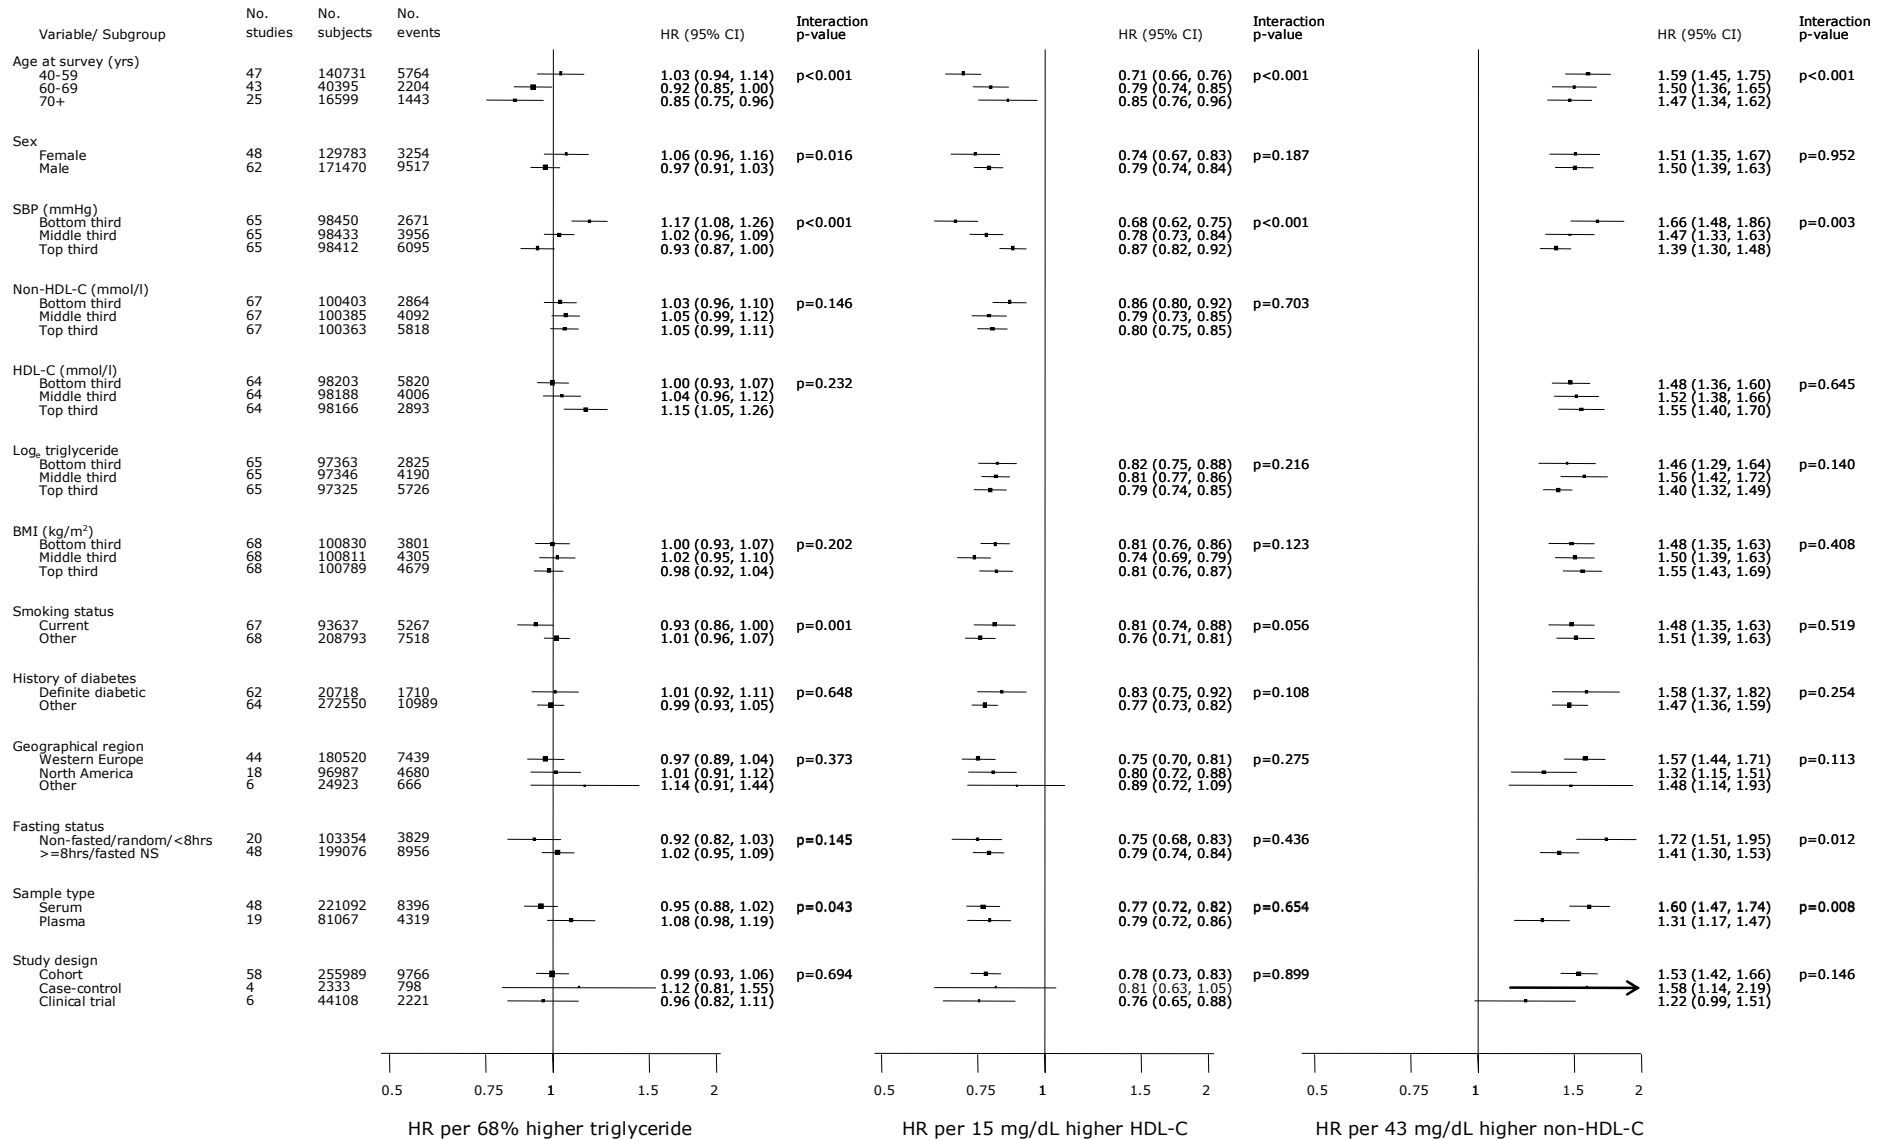

Regression analyses were stratified, where appropriate, by sex and trial arm and adjusted for age, systolic blood pressure, smoking status, history of diabetes, body mass index; furthermore analyses of log<sub>e</sub> triglyceride were adjusted for HDL-C and non-HDL-C levels, analyses of HDL-C were adjusted for non-HDL-C and log<sub>e</sub> triglyceride levels, and analyses of non-HDL-C were adjusted for HDL-C and log<sub>e</sub> triglyceride levels, analyses. Studies with fewer than 10 cases were excluded from analysis. P-values for interaction were calculated from analyses using continuous variables where appropriate. Sizes of data markers are proportional to the inverse of the variance of the hazard ratios.

**eFigure 3.** Study-specific hazard ratios for CHD per 1 SD higher of usual triglyceride, HDL-C and non-HDL-C levels adjusted for usual levels of potential confounding factors\*.

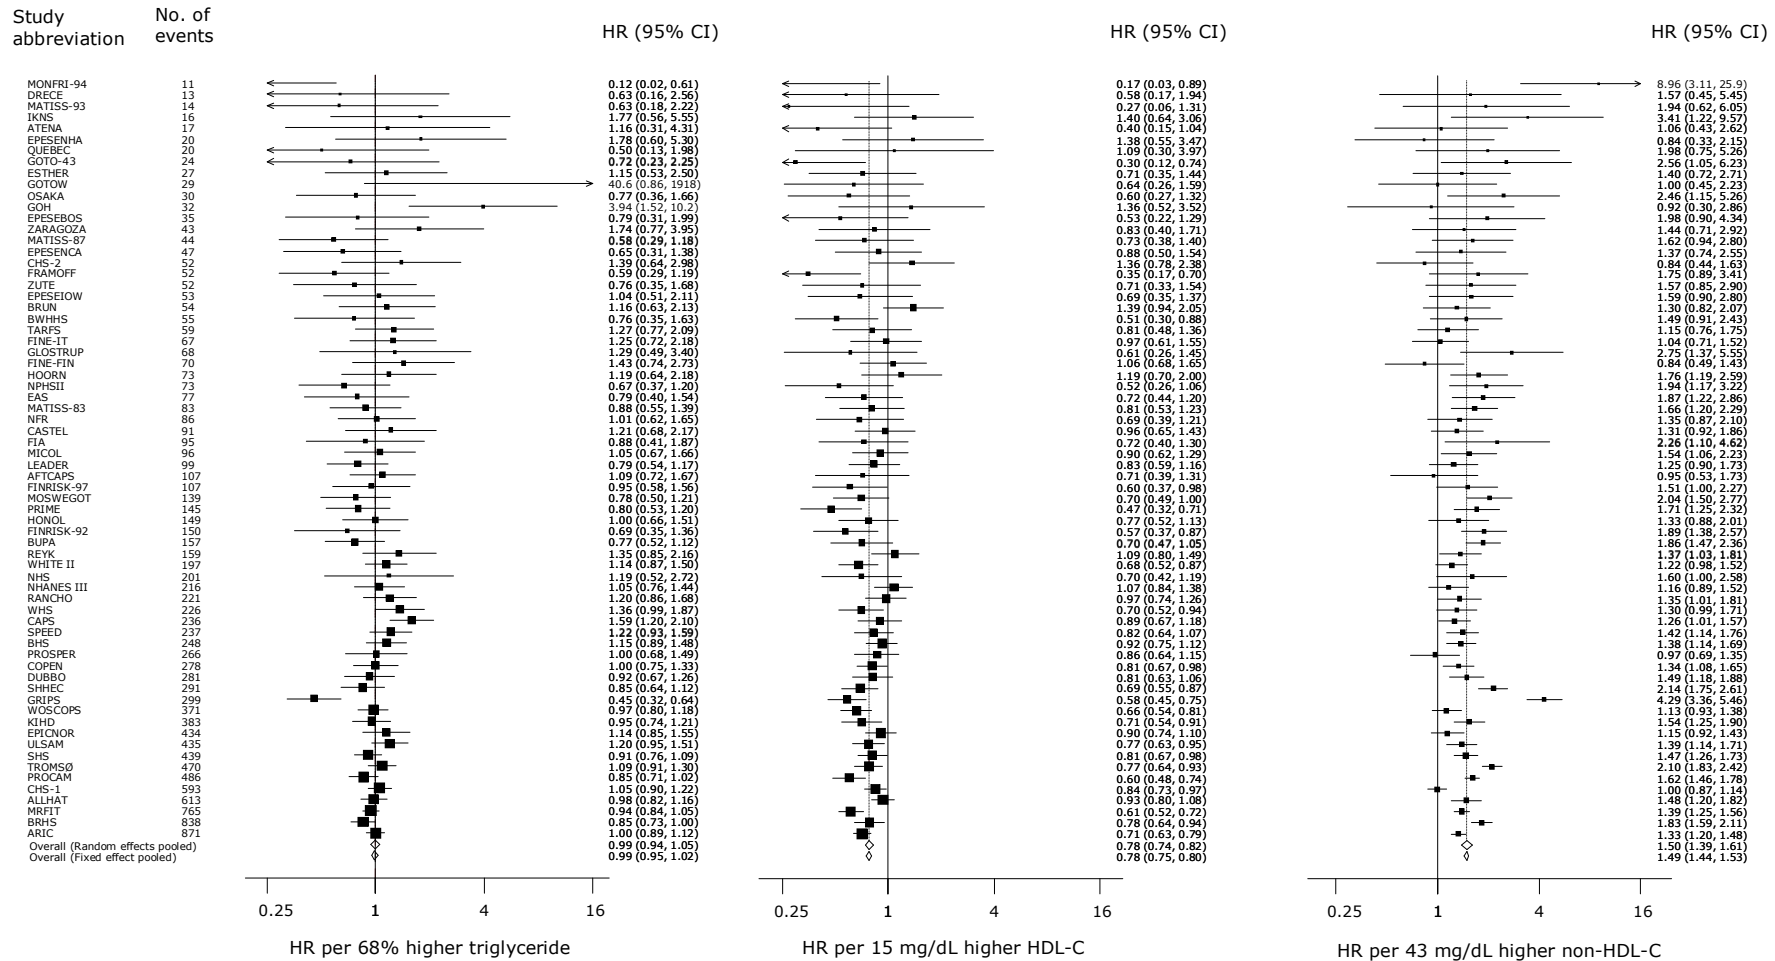

Test for heterogeneity ( $I^2$  [95% CI]): 35% (12%, 52%) triglyceride, 40% (20%, 55%) HDL-C, and 73% (66%, 79%) non-HDL-C, but the heterogeneity was not significantly explained by study size as measured by the number of CHD cases recorded ( $p > 0.1$  for meta-regression of log HR on the number of CHD cases).

\*Adjusted for age, systolic blood pressure, smoking status, history of diabetes, body mass index; furthermore analyses of  $\log_e$  triglyceride were adjusted for HDL-C and non-HDL-C levels, analyses of HDL-C were adjusted for non-HDL-C and  $\log_e$  triglyceride levels, analyses of non-HDL-C were adjusted for HDL-C and  $\log_e$  triglyceride levels. Sizes of data markers are proportional to the inverse of the variance of the hazard ratios.

## eAppendix 1. Reference list of the contributing studies (56 references represent the 68 studies)

1. Sharrett AR, Ballantyne CM, Coady SA et al. Coronary heart disease prediction from lipoprotein cholesterol levels, triglycerides, lipoprotein(a), apolipoproteins A-I and B, and HDL density subfractions: The Atherosclerosis Risk in Communities (ARIC) Study. *Circulation* 2001; 104(10):1108-1113.
2. Palmieri L, Donfrancesco C, Giampaoli S et al. Favorable cardiovascular risk profile and 10-year coronary heart disease incidence in women and men: results from the Progetto CUORE. *Eur J Cardiovasc Prev Rehabil* 2006; 13(4):562-570.
3. Knuiman MW, Vu HT. Prediction of coronary heart disease mortality in Busselton, Western Australia: an evaluation of the Framingham, national health epidemiologic follow up study, and WHO ERICA risk scores. *J Epidemiol Community Health* 1997; 51(5):515-519.
4. Pocock SJ, Shaper AG, Phillips AN. Concentrations of high density lipoprotein cholesterol, triglycerides, and total cholesterol in ischaemic heart disease. *BMJ* 1989; 298(6679):998-1002.
5. Kiechl S, Willeit J. The Natural Course of Atherosclerosis : Part I: Incidence and Progression. *Arterioscler Thromb Vasc Biol* 1999; 19(6):1484-1490.
6. Wald NJ, Law M, Watt HC et al. Apolipoproteins and ischaemic heart disease: implications for screening. *Lancet* 1994; 343(8889):75-79.
7. Lawlor DA, Bedford C, Taylor M, Ebrahim S. Geographical variation in cardiovascular disease, risk factors, and their control in older women: British Women's Heart and Health Study. *J Epidemiol Community Health* 2003; 57(2):134-140.
8. Bainton D, Miller NE, Bolton CH et al. Plasma triglyceride and high density lipoprotein cholesterol as predictors of ischaemic heart disease in British men. The Caerphilly and Speedwell Collaborative Heart Disease Studies. *Br Heart J* 1992; 68(1):60-66.
9. Casiglia E, Palatini P. Cardiovascular risk factors in the elderly. *J Hum Hypertens* 1998; 12(9):575-581.
10. Psaty BM, Anderson M, Kronmal RA et al. The association between lipid levels and the risks of incident myocardial infarction, stroke, and total mortality: The Cardiovascular Health Study. *J Am Geriatr Soc* 2004; 52(10):1639-1647.
11. Nordestgaard BG, Benn M, Schnohr P, Tybjaerg-Hansen A. Nonfasting Triglycerides and Risk of Myocardial Infarction, Ischemic Heart Disease, and Death in Men and Women. *JAMA* 2007; 298(3):299-308.
12. Ballesteros-Pomar MD, Rubio-Herrera MA, Gutierrez-Fuentes JA et al. Dietary Habits and Cardiovascular Risk in the Spanish Population: The DRECE Study (I). *Annals of Nutrition and Metabolism* 2000; 44(3):108-114.
13. Simons LA, Simons J, Friedlander Y, McCallum J. Risk factors for acute myocardial infarction in the elderly (the Dubbo study). *Am J Cardiol* 2002; 89(1):69-72.
14. Gerald RF, Housley E, Riemersma RA et al. Smoking, Lipids, Glucose Intolerance, and Blood Pressure as Risk Factors for Peripheral Atherosclerosis Compared with Ischemic Heart Disease in the Edinburgh Artery Study. *Am J Epidemiol* 1992; 135(4):331-340.
15. Cornoni-Huntley J, Ostfeld AM, Taylor JO et al. Established populations for epidemiologic studies of the elderly: study design and methodology. *Aging (Milano)* 1993; 5(1):27-37.
16. Raum E, Lietzau S, Stegmaier C, Brenner H, Rothenbacher D. For the majority of patients with diabetes blood pressure and lipid management is not in line with recommendations. Results from a large population-based cohort in Germany. *Pharmacoepidemiol Drug Saf* 2008; 17(5):485-494.
17. Menotti A, Mulder I, Nissinen A et al. Cardiovascular risk factors and 10-year all-cause mortality in elderly European male populations. The FINE study. *Eur Heart J* 2001; 22(7):573-579.

18. Vartiainen E, Jousilahti P, Alfthan G, Sundvall J, Pietinen P, Puska P. Cardiovascular risk factor changes in Finland, 1972-1997. *Int J Epidemiol* 2000; 29(1):49-56.
19. Ingelsson E, Schaefer EJ, Contois JH et al. Clinical Utility of Different Lipid Measures for Prediction of Coronary Heart Disease in Men and Women. *JAMA* 2007; 298(7):776-785.
20. Gerber Y, Dankner R, Chetrit A, Novikov I, Goldbourt U. The role of risk factor time trends in the steep decline of CHD mortality between two Israeli cohort studies. *Preventive Medicine* 2005; 41(1):85-91.
21. Rosengren A, Eriksson H, Larsson B et al. Secular changes in cardiovascular risk factors over 30 years in Swedish men aged 50: the study of men born in 1913, 1923, 1933 and 1943. *J Intern Med* 2000; 247(1):111-118.
22. Zylberstein DE, Bengtsson C, Bjorkelund C et al. Serum homocysteine in relation to mortality and morbidity from coronary heart disease: a 24-year follow-up of the population study of women in Gothenburg. *Circulation* 2004; 109(5):601-606.
23. Cremer P, Nagel D, Mann H et al. Ten-year follow-up results from the Goettingen Risk, Incidence and Prevalence Study (GRIPS). I. Risk factors for myocardial infarction in a cohort of 5790 men. *Atherosclerosis* 1997; 129(2):221-230.
24. Austin MA, Rodriguez BL, McKnight B et al. Low-density lipoprotein particle size, triglycerides, and high-density lipoprotein cholesterol as risk factors for coronary heart disease in older Japanese-American men. *Am J Cardiol* 2000; 86(4):412-416.
25. Bos G, Dekker JM, Nijpels G et al. A combination of high concentrations of serum triglyceride and non-high-density-lipoprotein-cholesterol is a risk factor for cardiovascular disease in subjects with abnormal glucose metabolism--The Hoorn Study. *Diabetologia* 2003; 46(7):910-916.
26. Iso H, Naito Y, Sato S et al. Serum triglycerides and risk of coronary heart disease among Japanese men and women. *Am J Epidemiol* 2001; 153(5):490-499.
27. Salonen JT, Salonen R, Seppanen K, Rauramaa R, Tuomilehto J. HDL, HDL2, and HDL3 subfractions, and the risk of acute myocardial infarction. A prospective population study in eastern Finnish men. *Circulation* 1991; 84(1):129-139.
28. The RIFLE Research Group. Presentation of the RIFLE project risk factors and life expectancy. *Eur J Epidemiol* 1993; 9(5):459-476.
29. Wilhelmsen L, Johansson S, Rosengren A, Wallin I, Dotevall A, Lappas G. Risk factors for cardiovascular disease during the period 1985-1995 in Goteborg, Sweden. The GOT-MONICA Project. *J Intern Med* 1997; 242(3):199-211.
30. Gardner CD, Winkleby MA, Fortmann SP. Population frequency distribution of non-high-density lipoprotein cholesterol (Third National Health and Nutrition Examination Survey [NHANES III], 1988-1994). *Am J Cardiol* 2000; 86(3):299-304.
31. Cooper JA, Miller GJ, Humphries SE. A comparison of the PROCAM and Framingham point-scoring systems for estimation of individual risk of coronary heart disease in the Second Northwick Park Heart Study. *Atherosclerosis* 2005; 181(1):93-100.
32. Iso H, Naito Y, Kitamura A et al. Serum total cholesterol and mortality in a Japanese population. *J Clin Epidemiol* 1994; 47(9):961-969.
33. Luc G, Bard JM, Ferrieres J et al. Value of HDL Cholesterol, Apolipoprotein A-I, Lipoprotein A-I, and Lipoprotein A-I/A-II in Prediction of Coronary Heart Disease: The PRIME Study. *Arterioscler Thromb Vasc Biol* 2002; 22(7):1155-1161.
34. Assmann G, Schulte H. Relation of high-density lipoprotein cholesterol and triglycerides to incidence of atherosclerotic coronary artery disease (the PROCAM experience). Prospective Cardiovascular Munster study. *Am J Cardiol* 1992; 70(7):733-737.
35. Despres JP, Lemieux I, Dagenais GR, Cantin B, Lamarche B. HDL-cholesterol as a marker of coronary heart disease risk: the Quebec cardiovascular study. *Atherosclerosis* 2000; 153(2):263-272.

36. von MD, Langer RD, Barrett-Connor E. Sex and time differences in the associations of non-high-density lipoprotein cholesterol versus other lipid and lipoprotein factors in the prediction of cardiovascular death (The Rancho Bernardo Study). *Am J Cardiol* 2003; 91(11):1311-1315.
37. Jonsdottir LS, Sigfusson N, Gudnason V, Sigvaldason H, Thorgeirsson G. Do lipids, blood pressure, diabetes, and smoking confer equal risk of myocardial infarction in women as in men? The Reykjavik Study. *J Cardiovasc Risk* 2002; 9(2):67-76.
38. Woodward M, Brindle P, Tunstall-Pedoe H, for the SIGN group on risk estimation\*. Adding social deprivation and family history to cardiovascular risk assessment: the ASSIGN score from the Scottish Heart Health Extended Cohort (SHHEC). *Heart* 2007; 93(2):172-176.
39. Howard BV, Welty TK, Fabsitz RR et al. Risk factors for coronary heart disease in diabetic and nondiabetic Native Americans. The Strong Heart Study. *Diabetes* 1992; 41 Suppl 2:4-11.:4-11.
40. Onat A, Surdum-Avci G, Senocak M, Ornek E, Gozukara Y. Plasma lipids and their interrelationship in Turkish adults. *J Epidemiol Community Health* 1992; 46(5):470-476.
41. Miller NE, Thelle DS, Forde OH, Mjos OD. The Tromso heart-study. High-density lipoprotein and coronary heart-disease: a prospective case-control study. *Lancet* 1977; 1(8019):965-968.
42. Lind L, Vessby B, Sundstrom J. The Apolipoprotein B/AI Ratio and the Metabolic Syndrome Independently Predict Risk for Myocardial Infarction in Middle-Aged Men. *Arterioscler Thromb Vasc Biol* 2006; 26(2):406-410.
43. Singh-Manoux A, Gimeno D, Kivimaki M, Brunner E, Marmot MG. Low HDL cholesterol is a risk factor for deficit and decline in memory in midlife: the Whitehall II study. *Arterioscler Thromb Vasc Biol* 2008; 28(8):1556-1562.
44. Ridker PM, Rifai N, Cook NR, Bradwin G, Buring JE. Non-HDL Cholesterol, Apolipoproteins A-I and B100, Standard Lipid Measures, Lipid Ratios, and CRP as Risk Factors for Cardiovascular Disease in Women. *JAMA* 2005; 294(3):326-333.
45. Marin A, Medrano MJ, Gonzalez J et al. Risk of ischaemic heart disease and acute myocardial infarction in a Spanish population: observational prospective study in a primary-care setting. *BMC Public Health* 2006; 6:38.
46. Weijenberg MP, Feskens EJM, Kromhout D. Total and High Density Lipoprotein Cholesterol as Risk Factors for Coronary Heart Disease in Elderly Men during 5 Years of Follow-up: The Zutphen Elderly Study. *Am J Epidemiol* 1996; 143(2):151-158.
47. Gotto AM, Jr., Whitney E, Stein EA et al. Relation between baseline and on-treatment lipid parameters and first acute major coronary events in the Air Force/Texas Coronary Atherosclerosis Prevention Study (AFCAPS/TexCAPS). *Circulation* 2000; 101(5):477-484.
48. The ALLHAT Officers and Coordinators for the ALLHAT Collaborative Research Group. Major Outcomes in Moderately Hypercholesterolemic, Hypertensive Patients Randomized to Pravastatin vs Usual Care: The Antihypertensive and Lipid-Lowering Treatment to Prevent Heart Attack Trial (ALLHAT-LLT). *JAMA* 2002; 288(23):2998-3007.
49. Meade TW. Design and intermediate results of the Lower Extremity Arterial Disease Event Reduction (LEADER) trial of bezafibrate in men with lower extremity arterial disease. *Curr Control Trials Cardiovasc Med* 2001; 2(4):195-204.
50. Watkins LO, Neaton JD, Kuller LH. Racial differences in high-density lipoprotein cholesterol and coronary heart disease incidence in the usual-care group of the Multiple Risk Factor Intervention Trial. *Am J Cardiol* 1986; 57(8):538-545.
51. Packard CJ, Ford I, Robertson M et al. Plasma lipoproteins and apolipoproteins as predictors of cardiovascular risk and treatment benefit in the PROspective Study of Pravastatin in the Elderly at Risk (PROSPER). *Circulation* 2005; 112(20):3058-3065.
52. West of Scotland Coronary Prevention Study Group. Influence of pravastatin and plasma lipids on clinical events in the West of Scotland Coronary Prevention Study (WOSCOPS). *Circulation* 1998; 97(15):1440-1445.

53. van der Steeg WA, Boekholdt SM, Stein EA et al. Role of the apolipoprotein B-apolipoprotein A-I ratio in cardiovascular risk assessment: a case-control analysis in EPIC-Norfolk. *Ann Intern Med* 2007; 146(9):640-648.
54. Dahlen GH, Weinehall L, Stenlund H et al. Lipoprotein(a) and cholesterol levels act synergistically and apolipoprotein A-I is protective for the incidence of primary acute myocardial infarction in middle-aged males. An incident case-control study from Sweden. *J Intern Med* 1998; 244(5):425-430.
55. Sjol A, Grunnet K, Schroll M. Secular trends in serum cholesterol, high density lipoproteins and triglycerides 1964-1987. *Int J Epidemiol* 1991; 20(1):105-113.
56. Shai I, Rimm EB, Hankinson SE et al. Multivariate Assessment of Lipid Parameters as Predictors of Coronary Heart Disease Among Postmenopausal Women: Potential Implications for Clinical Guidelines. *Circulation* 2004; 110(18):2824-2830.

## eAppendix 2

Because direct measurement of low density lipoprotein cholesterol (LDL-C) has been relatively uncommon in long-term prospective studies, most studies have tended to use the Friedewald equation<sup>1</sup> to estimate LDL-C values from the measured concentrations of total cholesterol (TC), high density lipoprotein cholesterol (HDL-C), and triglycerides (divided by a constant):

$$\text{Calculated LDL-C} = \text{TC} - \text{HDL-C} - (\text{triglycerides}/2.2) \quad (1)$$

where triglycerides/2.2 approximates the concentration of cholesterol carried in very low density lipoprotein (VLDL-C) when the units of measurement are mmol/l (if mg/dl are used, the constant is 5.0).

Non-HDL-C (calculated as the difference between TC and HDL-C) can be substituted into equation 1:

$$\text{Calculated LDL-C} = \text{non-HDL-C} - (\text{triglycerides}/2.2) \quad (2)$$

As a consequence, any regression model (eg, Cox proportional hazards model for survival data, or logistic regression model for case-control data) that concomitantly includes calculated LDL-C, HDL-C and triglycerides, is simply a mathematical rearrangement of a model that includes non-HDL-C, HDL-C and triglycerides, as shown below.

Consider a survival model for the log hazard ratio (HR) including non-HDL-C, HDL-C and triglycerides (TG), where the mutually adjusted coefficients for each term are given by  $\beta_1$ ,  $\beta_2$  and  $\beta_3$ , respectively:

$$\log\text{HR} = \beta_1 \text{ non-HDL-C} + \beta_2 \text{ HDL-C} + \beta_3 \text{ TG} \quad (3)$$

Adding and subtracting  $(\beta_1/2.2)$  TG and simplifying yields:

$$\begin{aligned} \log\text{HR} &= \beta_1 \text{ non-HDL-C} + \beta_2 \text{ HDL-C} + \beta_3 \text{ TG} + (\beta_1/2.2 - \beta_1/2.2) \text{ TG} \\ &= \beta_1 (\text{non-HDL-C} - \text{TG}/2.2) + \beta_2 \text{ HDL-C} + (\beta_3 + \beta_1/2.2) \text{ TG} \end{aligned}$$

Substituting calculated LDL-C for  $(\text{non-HDL-C} - \text{TG}/2.2)$  as in equation 2 gives:

$$\log\text{HR} = \beta_1 \text{ calculated LDL-C} + \beta_2 \text{ HDL-C} + (\beta_3 + \beta_1/2.2) \text{ TG} \quad (4)$$



Comparing equations 3 and 4 demonstrates that:

- the calculated LDL-C parameter ( $\beta_1$  in equation 4) equals the non-HDL-C parameter ( $\beta_1$  in equation 3) in any model that also includes HDL-C and triglycerides. Indeed, any of the coefficients in equation 4 can be calculated from those in equation 3, should the need arise.
- when calculated LDL-C, HDL-C and triglycerides are included in the same model (equation 4), the coefficient for triglycerides is biased by  $\beta_1/2.2$  (or  $\beta_1/5.0$  if mg/dl are used) compared to equation 3. This means that even if triglycerides concentration was not associated with the outcome of interest in equation 3 (ie.  $\beta_3 = 0$ ), then it would appear to have an association of ( $\beta_1/2.2$ ) when adjusted for calculated LDL-C and HDL-C in equation 4.

In the current ERFC analyses,  $\log_e$  triglycerides concentration has been used rather than triglycerides concentration, but a similar bias as described above for triglycerides concentration applies with use of calculated LDL-C. Hence, non-HDL-C concentration has been used in the current report rather than calculated LDL-C.

#### Reference

1) Friedewald WT, Levy RI and Fredrickson DS. Estimation of the concentration of low-density lipoprotein cholesterol in plasma, without use of the preparative ultracentrifuge. *Clin Chem.* 1972;18(6):499-502

### **eAppendix 3. List of studies' acronyms**

**AFCAPS**, Air Force/Texas Coronary Atherosclerosis Prevention Study

**ALLHAT**, Antihypertensive and Lipid-Lowering Treatment to Prevent Heart Attack Trial

**AMORIS**, Apolipoprotein Related Mortality Risk Study

**ARIC**, Atherosclerosis Risk in Communities Study

**ATTICA**, ATTICA Study

**ATENA**, cohort of Progetto CUORE

**BHS**, Busselton Health Study

**BIP**, Bezafibrate Infarction Prevention Registry Study

**BRHS**, British Regional Heart Study

**BRUN**, Bruneck Study

**BUPA**, BUPA Study

**BWHHS**, British Women's Heart and Health Study

**CaPS**, Caerphilly Prospective Study

**CASTEL**, Cardiovascular Study in the Elderly

**CHARL**, Charleston Heart Study

**CHS-1**, cohort of Cardiovascular Health Study

**CHS-2**, cohort of Cardiovascular Health Study

**COPEN**, Copenhagen City Heart Study

**CUORE**, Progetto CUORE

**DRECE**, Diet and Risk of Cardiovascular Disease in Spain

**DUBBO**, Dubbo Study of the Elderly

**EAS**, Edinburgh Artery Study

**EPESEBOS**, The Established Populations for the Epidemiologic Study of the Elderly Studies, Boston

**EPESEIOW**, The Established Populations for the Epidemiologic Study of the Elderly Studies, Iowa

**EPESENCA**, The Established Populations for the Epidemiologic Study of the Elderly Studies, North Carolina

**EPESENHA**, The Established Populations for the Epidemiologic Study of the Elderly Studies, New Haven

**EPICNOR**, EPIC Norfolk Study

**ESTHER**, Epidemiologische Studie zu Chancen der Verhütung, Früherkennung und Therapie chronischer Erkrankungen in der älteren Bevölkerung

**FIA**, First myocardial infarction in Northern Sweden

**FINE-FIN**, Finland, Italy and Netherlands Elderly Study - Finland cohort

**FINE-IT**, Finland, Italy and Netherlands Elderly Study - Italian cohort

**FINRISK-92**, Finrisk Cohort 1992

**FINRISK-97**, Finrisk Cohort 1997

**FLETCHER**, Fletcher Challenge Blood Study

**FRAMOFF**, Framingham Offspring Study

**GLOSTRUP**, Glostrup Study

**GOH**, The Glucose Intolerance, Obesity and Hypertension Study

**GOTO33**, Göteborg 1933 Study

**GOTO43**, Göteborg 1943 Study

**GOTOW**, Population Study of Women in Göteborg, Sweden

**GRIPS**, Göttingen Risk Incidence and Prevalence Study

**HELSINAG**, Helsinki Aging Study

**HONOL**, Honolulu Heart Program

**HOORN**, Hoorn Study  
**HPFS**, Health Professionals Follow-up Study  
**IKNS**, Ikawa, Kyowa, and Noichi Study  
**ISRAEL**, Israeli Ischaemic Heart Disease Study  
**NORTH KARELIA**, North Karelia Project  
**KIHD**, Kuopio Ischaemic Heart Disease Study  
**LASA**, Longitudinal Aging Study Amsterdam  
**LEADER**, Lower Extremity Arterial Disease Event Reduction Trial  
**MALMO**, Malmö Study  
**MATISS-83**, cohort of Progetto CUORE  
**MATISS-87**, cohort of Progetto CUORE  
**MATISS-93**, cohort of Progetto CUORE  
**MCVDRFP**, Monitoring of CVD Risk Factors Project  
**MICOL**, cohort of Risk Factors and Life Expectancy Pooling Project  
**MOGERAUG1**, MONICA/KORA Augsburg Surveys S1  
**MOGERAUG2**, MONICA/KORA Augsburg Surveys S2  
**MOGERAUG3**, MONICA/KORA Augsburg Surveys S3  
**MONFRI-94**, cohort of Progetto CUORE  
**MORGEN**, Monitoring Project on Chronic Disease Risk Factors  
**MOSWEGOT**, MONICA Göteborg Study  
**MRFIT**, Multiple Risk Factor Intervention Trial 1  
**NCS**, Norwegian Counties Study  
**NFR**, cohort of Risk Factors and Life Expectancy Pooling Project  
**NHANES I**, National Health and Nutrition Examination Survey I  
**NHANES II**, National Health and Nutrition Examination Survey II  
  
**NHANES III**, National Health and Nutrition Examination Survey III  
**NHS**, Nurses Health Study  
**NPHSI**, Northwick Park Heart Study I  
**NPHSII**, Northwick Park Heart Study II  
**OSAKA**, Osaka Study  
**OSLO**, Oslo Study  
**OYABE**, Oyabe study  
**PARIS1**, Paris Prospective Study I  
**PRHHP**, Puerto Rico Heart Health Program  
**PRIME**, Prospective Epidemiological Study of Myocardial Infarction  
**PROCAM**, Prospective Cardiovascular Münster Study  
**PROSPER**, Prospective Study of Pravastatin in the Elderly at Risk  
**QUEBEC**, Quebec Cardiovascular Study  
**RANCHO**, Rancho Bernardo Study  
**REYK**, Reykjavik Study  
**RIFLE**, Risk Factors and Life Expectancy Pooling Project  
**ROTT**, The Rotterdam Study  
**SHHEC**, Scottish Heart Health Extended Cohort  
**SHS**, Strong Heart Study

**SPEED**, Speedwell Study  
**TARFS**, Turkish Adult Risk Factor Study  
**TPT**, Thrombosis Prevention Trial  
**TROMSØ**, Tromsø Study  
**ULSAM**, Uppsala Longitudinal Study of Adult Men  
**USPHS**, U.S. Physicians Health Study  
**USPHS2**, U.S. Physicians Health Study 2  
**VHMPP**, Vorarlberg Health Monitoring and Promotion Programme  
**VITA**, Vicenza Thrombophilia and Atherosclerosis Project  
**WHITE I**, Whitehall I Study  
**WHITE II**, Whitehall II Study  
**WHS**, Womens Health Study  
**WOSCOPS**, West of Scotland Coronary Prevention Study  
**XIAN**, Xi'an Cohort Study  
**ZARAGOZA**, Zaragosa study  
**ZUTE**, Zutphen Elderly Study
